# Supplementary material for: Evolution of SARS-CoV-2 Envelope, Membrane, Nucleocapsid, and Spike Structural Proteins from the Beginning of the Pandemic to September 2020: A Global and Regional Approach by Epidemiological Week
Source: Viruses. 2021 Feb 4;13(2):243. doi: 10.3390/v13020243 (PMC7913946; doi:10.3390/v13020243)
Supplement: Supplementary file 1 [file viruses-13-00243-s001.zip]

Archive with 6 entries (6 files):
- Supplementary Figure 1.pdf
- Supplementary_Table_1.xlsx
- Supplementary_Table_2.xlsx
- Supplementary_Table_3.xlsx
- Supplementary_Table_4.xlsx
- Supplementary_Table_5.xlsx
