# Supplementary material for: Evolution of SARS-CoV-2 Envelope, Membrane, Nucleocapsid, and Spike Structural Proteins from the Beginning of the Pandemic to September 2020: A Global and Regional Approach by Epidemiological Week
Source: Viruses. 2021 Feb 4;13(2):243. doi: 10.3390/v13020243 (PMC7913946; doi:10.3390/v13020243)
Supplement: Supplementary file 1 [file viruses-13-00243-s001.zip › Supplementary_Table_1.xlsx]

## Sheet: Hoja1
S1 Table. Epiweeks with available sequences in each structural SARS-CoV-2 protein across geographic regions.
Number of Spike/Envelope/Membrane/Nucleocapsid sequences
Epiweek	Date	Europe (S/E/M/N)	Asia (S/E/M/N)	North America (S/E/M/N)	South America (S/E/M/N)	Africa (S/E/M/N)	Oceania (S/E/M/N)	Total (S/E/M/N)
2019 epiweek 52	Dec 22th - Dec 28th	(-/-/-/-)	(2/2/2/2)	(-/-/-/-)	(-/-/-/-)	(-/-/-/-)	(-/-/-/-)	(2/2/2/2)
2020 epiweek 1	Dec 29th - Jan 4th	(-/-/-/-)	(27/27/27/26)	(-/-/-/-)	(-/-/-/-)	(-/-/-/-)	(-/-/-/-)	(27/27/27/26)
2020 epiweek 2	Jan 5th - Jan 11th	(-/-/-/-)	(10/11/11/11)	(-/-/-/-)	(-/-/-/-)	(-/-/-/-)	(-/-/-/-)	(10/11/11/11)
2020 epiweek 3	Jan 12th - Jan 18th	(-/-/-/-)	(27/27/27/27)	(-/-/-/-)	(-/-/-/-)	(-/-/-/-)	(-/-/-/-)	(27/27/27/27)
2020 epiweek 4	Jan 19th - Jan 25th	(3/3/3/3)	(179/181/184/178)	(9/9/9/9)	(-/-/-/-)	(-/-/-/-)	(9/9/9/8)	(200/202/205/198)
2020 epiweek 5	Jan 26th - Feb 1th	(29/29/29/29)	(286/282/288/277)	(13/13/14/14)	(-/-/-/-)	(-/-/-/-)	(10/10/10/10)	(338/334/341/330)
2020 epiweek 6	Feb 2th - Feb 8th	(19/19/19/19)	(187/189/189/185)	(1/1/1/1)	(-/-/-/-)	(-/-/-/-)	(4/4/4/4)	(211/213/213/209)
2020 epiweek 7	Feb 9th - Feb 15th	(9/10/10/10)	(133/132/133/131)	(3/3/3/2)	(-/-/-/-)	(-/-/-/-)	(-/-/-/-)	(145/145/146/143)
2020 epiweek 8	Feb 16th - Feb 22th	(16/16/17/17)	(175/174/176/171)	(30/29/30/27)	(-/-/-/-)	(1/1/1/1)	(2/2/2/2)	(224/222/226/218)
2020 epiweek 9	Feb 23th - Feb 29th	(230/231/233/231)	(158/158/159/153)	(93/90/93/90)	(5/5/5/5)	(3/3/3/3)	(11/8/12/8)	(500/495/505/490)
2020 epiweek 10	Mar 1th - Mar 7th	(1519/1548/1558/1540)	(191/193/194/186)	(404/384/410/390)	(34/34/33/26)	(8/9/9/9)	(36/25/37/24)	(2192/2193/2241/2175)
2020 epiweek 11	Mar 8th - Mar 14th	(3094/3169/3178/3094)	(305/304/307/301)	(1340/1315/1358/1290)	(116/106/105/77)	(13/14/14/12)	(141/105/142/105)	(5009/5013/5104/4879)
2020 epiweek 12	Mar 15th - Mar 21th	(4660/4727/4751/4672)	(642/640/648/620)	(2472/2417/2520/2327)	(246/189/233/168)	(66/69/70/64)	(583/485/586/481)	(8669/8527/8808/8332)
2020 epiweek 13	Mar 22th - Mar 28th	(7434/7548/7586/7394)	(450/451/455/417)	(3028/2946/3042/2896)	(187/138/199/126)	(76/78/79/73)	(880/701/890/692)	(12055/11862/12251/11598)
2020 epiweek 14	Mar 29th – Apr 4th	(7327/7507/7516/7382)	(615/608/616/581)	(3193/3074/3238/3008)	(270/271/286/259)	(107/113/116/106)	(511/431/518/426)	(12023/12004/12290/11762)
2020 epiweek 15	Apr 5th - Apr 11th	(5939/6040/6068/6004)	(425/426/420/415)	(1648/1621/1683/1559)	(131/132/134/119)	(91/95/98/78)	(293/263/302/259)	(8527/8577/8705/8434)
2020 epiweek 16	Apr 12th - Apr 18th	(4825/4951/4962/4890)	(333/339/340/320)	(1194/1195/1219/1179)	(140/141/142/129)	(74/69/77/65)	(161/134/165/136)	(6727/6829/6905/6719)
2020 epiweek 17	Apr 19th - Apr 25th	(3951/4017/4041/4006)	(320/329/331/315)	(1175/1184/1196/1170)	(111/106/114/87)	(108/101/119/92)	(59/54/63/51)	(5724/5791/5864/5721)
2020 epiweek 18	Apr 26th – May 2th	(2942/3034/3041/2999)	(322/327/331/324)	(1337/1349/1361/1309)	(80/80/82/77)	(122/109/125/106)	(59/58/62/55)	(4862/4957/5002/4870)
2020 epiweek 19	May 3th - May 9th	(2040/2085/2085/2070)	(297/297/298/276)	(977/996/999/981)	(52/49/53/48)	(56/56/57/41)	(59/52/61/49)	(3481/3535/3553/3465)
2020 epiweek 20	May 10th - May 16th	(1718/1757/1771/1727)	(305/307/312/295)	(1053/1082/1094/1045)	(8/8/8/6)	(64/64/63/53)	(56/55/60/56)	(3204/3273/3308/3182)
2020 epiweek 21	May 17th - May 23th	(1462/1492/1499/1477)	(367/407/411/405)	(827/816/838/795)	(7/8/9/5)	(56/56/57/47)	(28/30/33/31)	(2747/2809/2847/2760)
2020 epiweek 22	May 24th - May 30th	(900/919/920/910)	(442/470/471/464)	(797/802/809/804)	(14/12/17/10)	(99/98/99/83)	(54/53/56/53)	(2306/2354/2372/2324)
2020 epiweek 23	May 31th - Jun 6th	(669/698/695/694)	(365/368/367/358)	(637/636/640/636)	(8/8/9/6)	(100/100/100/99)	(24/20/24/18)	(1803/1830/1835/1811)
2020 epiweek 24	Jun 7th - Jun 13th	(511/528/531/521)	(403/403/404/400)	(657/671/678/663)	(1/1/1/1)	(85/88/90/87)	(53/47/55/45)	(1710/1738/1759/1717)
2020 epiweek 25	Jun 14th - Jun 20th	(522/535/541/522)	(485/491/495/487)	(651/657/662/646)	(20/21/21/21)	(134/153/152/151)	(97/91/99/90)	(1909/1948/1970/1917)
2020 epiweek 26	Jun 21th - Jun 27th	(429/443/443/437)	(172/170/173/168)	(467/472/479/454)	(33/33/34/30)	(43/55/55/55)	(211/212/214/211)	(1355/1385/1398/1355)
2020 epiweek 27	Jun 28th – Jul 4th	(254/260/261/253)	(103/102/101/98)	(356/361/365/352)	(41/41/41/41)	(130/138/138/135)	(437/435/440/435)	(1321/1337/1346/1314)
2020 epiweek 28	Jul 5th - Jul 11th	(294/300/300/294)	(183/184/185/181)	(374/378/380/376)	(3/4/4/4)	(101/105/106/105)	(838/869/891/885)	(1793/1840/1866/1845)
2020 epiweek 29	Jul 12th - Jul 18th	(503/479/504/481)	(124/154/153/151)	(293/303/305/300)	(26/22/26/21)	(244/248/248/244)	(1315/1303/1352/1300)	(2505/2509/2588/2497)
2020 epiweek 30	Jul 19th - Jul 25th	(490/481/488/483)	(163/170/170/155)	(207/209/215/210)	(12/12/12/12)	(192/196/197/196)	(934/891/937/887)	(1998/1959/2019/1943)
2020 epiweek 31	Jul 26th – Aug 1th	(455/446/456/441)	(35/35/35/35)	(250/252/251/247)	(1/1/1/1)	(159/162/163/163)	(105/47/105/46)	(1005/943/1011/933)
2020 epiweek 32	Aug 2th - Aug 8th	(940/932/951/935)	(13/13/13/12)	(168/167/166/166)	(9/9/9/9)	(57/57/57/57)	(46/5/46/5)	(1233/1183/1242/1184)
2020 epiweek 33	Aug 9th - Aug 15th	(1463/1433/1479/1440)	(119/160/160/157)	(151/150/151/149)	(15/15/15/15)	(42/43/43/43)	(34/2/34/2)	(1824/1803/1882/1806)
2020 epiweek 34	Aug 16th - Aug 22th	(1016/1016/1038/1015)	(26/44/44/44)	(152/157/158/155)	(9/10/10/10)	(51/51/51/51)	(8/8/8/8)	(1262/1286/1309/1283)
2020 epiweek 35	Aug 23th - Aug 29th	(598/608/611/598)	(10/10/10/10)	(40/38/40/38)	(-/-/-/-)	(23/24/24/24)	(9/9/9/9)	(680/689/694/679)
2020 epiweek 36	Aug 30th - Sep 5th	(206/224/224/222)	(15/15/15/15)	(60/55/58/57)	(-/-/-/-)	(-/-/-/-)	(7/7/7/7)	(288/301/304/301)
2020 epiweek 37	Sep 6th - Sep 12th	(36/37/37/36)	(5/5/5/5)	(51/51/52/51)	(-/-/-/-)	(-/-/-/-)	(3/3/3/3)	(95/96/97/95)
TOTAL		(56503/57522/57846/56846)	(8419/8605/8660/8356)	(24108/23883/24517/23396)	(1579/1456/1603/1313)	(2305/2355/2411/2243)	(7077/6428/7236/6401)	(99991/100249/102273/98555)
