# Supplementary material for: Evolution of SARS-CoV-2 Envelope, Membrane, Nucleocapsid, and Spike Structural Proteins from the Beginning of the Pandemic to September 2020: A Global and Regional Approach by Epidemiological Week
Source: Viruses. 2021 Feb 4;13(2):243. doi: 10.3390/v13020243 (PMC7913946; doi:10.3390/v13020243)
Supplement: Supplementary file 1 [file viruses-13-00243-s001.zip › Supplementary_Table_2.xlsx]

## Sheet: E
S2 Table. Analyzed sequences, number of aa changes, and mutated aa positions in each SARS-CoV-2 structural protein by geographic region.
Region	Total sequences	Number of found aa changes	Number of mutated aa positions	Frequency of aa changes	Aa changes
Global	101376	142	65	<0,10%	Y2H, F4L, V5F, V5I, V5L, V5A, S6L, E7K, E7D, E7Q, E8D, E8G, T9A, G10C, G10V, T11A, L12F, I13V, S16G, S16N, V17L, V17A, L18F, L19F, L19I, L19P, L19S, F20L, F20S, F20I, L21F, L21P, L21I, A22S, A22V, F23C, V24M, V24A, V24L, V25A, F26L, L27S, L27F, L28I, L28F, V29G, V29S, V29A, T30I, T30S, T30A, L31P, L31I, A32V, L34I, L34F, T35F, A36G, A36V, A36T, L37P, L37H, L37S, L37F, L37T, L37I, L37V, R38G, R38C…
				0.001	T9I, V62F, R69I, P71L, L73F.
				0.002	S68F.
Africa	2355	20	19	<0,10%	T9I, L19F, L21P, L27S, L37P, R38G, A41V, C43S, C44Y, N45R, V47G, V49L, S68F, L74V.
				0.001	L21F, K53R, R69I.
				0.002	V62F
				0.006	L73F
				0.015	V5F
Asia	8675	50	34	<0,10%	V5I, E7K, E8D, S16G, L19F, F20L, L21F, L21I, V29G, V29S, V29A, T30I, T30S, L31P, L34I, L34F, L37H, L37S, R38C, R38G, L39K, A41T, A41S, C43F, N45E, I46V, I46T, I46F, V47R, L51V, P54S, R61C, V62F, V62D, L65M, N66T, S68Y, R69I, V70F, P71S, P71L, D72V, D72Y, D72N.
				0.001	T9I, A36G, L73F.
				0.002	S68F, S68C, V75F.
Europe	58382	94	57	<0,10%	Y2H, F4L, V5F, V5L, V5I, E7K, E7D, E8D, T9A, G10C, G10V, T11A, L12F, I13V, S16N, V17L, V17A, L18F, L19I, L19P, L19S, L19F, F20S, A22S, A22V, F23C, V24M, V24A, V24L, V25A, F26L, L27F, L27S, L28I, L28F, V29S, T30A, L31P, L31I, A32V, A36V, A36G, L37F, L37T, L37I, L37V, L37H, R38G, L39M, A41S, A41V, C43F, N45Y, V47F, N48S, V49L, S50I, S50G, L51H, V52L, K53R, F56L, V58F, V58I, V58L, Y59H, Y59C, R61H, …
				0.001	T9I, L21F, T30I, S55F, R69I, P71L, L73F.
				0.003	S68F.
North America	23908	36	28	<0,10%	V5I, S6L, E7Q, E8D, E8G, T9I, F20L, V25A, F26L, T30I, T35F, A36T, A36V, L37F, R38G, A41V, A41S, C43F, V49L, S50I, L51F, K53N, S55F, V58F, N66T, V70F, L73I, L73V, L74P.
				0.001	F20I, T30A, S68F, P71S, P71L, L73F.
				0.002	V62F.
South America	1456	7	7	0.001	V5A, T9I, L21F, V24L, V52E.
				0.002	P71L.
				0.004	V58F.
Oceania	6600	16	15	<0,10%	V5L, A22V, C43S, V52L, V52I, S55F, R61L, N66H, S67P, R69I, P71L.
				0.001	L21F, S68F, L73F, L74M.
				0.002	V75L.

## Sheet: M
Region	Total sequences	Number of found aa changes	Number of mutated aa residues	Frequency of aa changes	Aa changes
Global	103419	291	165	<0,10%	M1K, M1I, A2P, A2T, D3A, D3Y, D3H, D3V, S4F, S4A, S4P, N5D, N5S, G6C, G6V, T7I, T7N, I8S, I8V, I8F, I8T, V10A, V10I, E11D, E11G, E12D, E12G, L13F, K14Q, K14E, K14F, K15Q, K15N, K15E, K15R, L16F, L16R, L17F, E18Q, Q19H, Q19R, Q19E, N21D, V23I, I24T, I24L, G25V, F26L, L27H, F28C, L29F, T30I, I32F, C33F, C33S, L34F, Q36H, F37I, A38S, A38P, A40S, A40D, A40V, N41T, R42K, R42M, N43K, N43S, R44M, R44K, …
				0.001	A2S, L17I, V23L, W31C, V60L, V70F, H125Y, D209Y.
				0.002	A2V.
				0.007	D3G.
				0.01	T175M.
Africa	2411	34	33	<0,1%	G6C, L13F, L17F, L17I, Q19H, I32F, F37I, A40S, N43K, I48T, A69S, N74K, T77A, G78S, L93F, A104V, N121T, L124V, T127S, I128T, I144V, T175M, L176P, L206V, N207D, T208I, S212R, S214I, I217L.
				0.002	A2V, C86F, M109I, D209Y.
				0.034	D3G
Asia	8730	75	61	<0,10%	A2S, D3A, D3Y, S4F, T7I, I8S, V10A, E11D, E11G, E12D, K15Q, V23L, I24T, G25V, F26L, A40S, A40D, L54I, A63V, A63S, C64Y, V66L, A68S, A69S, V70A, I76V, T77N, G78A, G79V, A83T, M84T, A85S, L90F, S94I, F96S, F100L, R107H, R107L, M109I, P123Q, T130P, L133M, L138I, A142V, A142P, R146S, H148Q, K162N, L176P, Q185H, S191L, A195V, Y196H, N207K, H210Y, S211A, S212G, S214I, Q222R.
				0.001	A2V, L34F, L46F, I52T, C64F, V70L, A81S, H125Y, D209Y, D209H, S214R.
				0.002	D3G, L29F, V70F, V70I.
				0.003	T175M.
Europe	58719	180	122	<0,10%	M1K, A2S, A2P, A2T, D3Y, D3H, S4F, S4A, N5D, G6V, T7I, I8V, I8F, I8T, V10I, V10A, E12G, L13F, K14Q, K15N, K15E, K15R, L16F, L17F, Q19H, N21D, I24L, F28C, L29F, T30I, C33F, C33S, L34F, Q36H, A38S, A40S, A40V, R42K, R42M, N43S, R44M, R44K, Y47S, F53S, F53L, L57S, A63V, A63T, A63S, C64F, C64S, V66L, L67F, A68S, A68T, A69S, A69V, V70F, V70I, V70A, I76V, I76L, T77I, T77N, G78C, G78S, I80F, I80T, A81V,…
				0.001	W31C, L46F, I52T, W75L.
				0.002	A2V, L17I, V23L, V60L, H125Y.
				0.009	D3G.
				0.016	T175M.
North America	24543	121	93	<0,10%	M1K, M1I, A2S, A2T, D3Y, S4F, S4P, N5S, T7N, I8T, I8S, V10I, E11G, K14E, K14F, L16R, L17F, L17I, E18Q, Q19R, Q19E, V23L, V23I, I24L, G25V, L27H, L29F, W31C, C33F, L34F, A38S, A38P, A40V, N41T, L46F, I52T, F53L, C64S, C64F, F65L, V66L, A69S, A69V, Y71C, I73A, N74D, W75L, G78C, G78S, G78D, A81S, A83S, M84I, A85V, A85S, A85D, C86F, L87F, G89S, M91I, M91L, S94I, I97F, A98S, A98D, S99F, R101K, A104V, …
				0.001	D3G, K15R, V70I, H125Y, T175M.
				0.002	A2V, V70F, D209Y.
South America	1603	13	12	0.001	D3V, S4F, V23L, F53L, A69S, M109I, P132A, R150H, I151V, R186C.
				0.003	T175M.
				0.006	V70F.
				0.028	D3G.
Oceania	7413	36	32	<0,10%	M1I, A2T, A2V, D3H, T7I, L16F, C33F, L46F, F53S, V60L, L62S, A69S, W75L, A81S, M84T, I97V, A98T, A98S, R107C, P114L, H125Y, P132S, I144T, R158C, G189V, A195V, T208I, A218V.
				0.001	V70F, I80T, V170I, S214I.
				0.002	D3G, R146H.
				0.003	T175M.
				0.008	A2S.

## Sheet: N
Region	Total sequences	Number of found aa changes	Number of mutated aa residues	Frequency of aa changes	Aa changes
Global	99657	890	359	<0,10%	S2P, S2Y, S2F, D3Y, D3G, D3L, D3N, N4D, G5R, G5V, G5E, P6H, P6S, P6T, Q7H, Q7K, Q7R, N8T, N8S, R10P, R10L, R10Q, N11D, N11S, N11T, N11I, A12S, A12G, A12T, A12V, P13T, P13S, P13R, P13H, R14L, R14C, R14P, R14H, R14G, I15L, I15V, T16M, T16A, G18V, G18S, G18C, G18A, G19R, G19E, G19V, P20L, P20S, S21P, S21L, S21T, D22Y, D22N, D22E, S23P, S23L, S23T, T24I, G25V, G25F, G25C, G25D, S26N, S26I, S26C, S26G…
				0.001	P6L, Q9H, T24N, G30R, R32H, G34W, S37P, R40C, A55S, V72I, D81Y, I84V, A119S, L139F, D144Y, P151L, A156S, P168S, S180I, R185C, S186Y, S187L, R195I, S206F, P207L, R209I, R209K, A211V, Q229H, G238C, T247I, A251V, Q289H, S327L, T334I, A359S, T362I, P365S, A376T, P383L, P383S, R385K, T393I.
				0.002	D22G, S33I, P67S, D128Y, P199S, G204L, A208G, L230F, M234I, Q384H.
				0.003	S190I, P199L, T205I, S235F, D377Y, D401Y.
				0.004	S183Y, S202N, I292T.
				0.005	A398V.
				0.007	S193I, A220V.
				0.01	S188L.
				0.017	S197L.
				0.018	P13L.
				0.019	D103Y.
				0.032	S194L.
				0.37	G204R.
				0.373	R203K.
Africa	2243	148	123	<0,1%	P6H, Q7H, Q9H, G18S, G25F, S26N, Q28H, N29D, R32C, S33G, A35V, R40C, Q43R, H59P, L64I, V72A, P80S, D103N, D128Y, T141I, T141A, D144Y, T148A, R149C, P151L, P151S, Q160R, G178D, S180I, A182S, S183Y, S184A, R185H, S186F, N192K, S193T, R195K, S197L, T198I, P199L, S201I, G204L, A208G, A208S, M210I, N213I, G214C, A220V, D225Y, Q229H, Q229R, S232R, M234L, K248R, Q260L, N269K, T271I, T271H, Q272N, P279T,…
				0.001	R10P, A12S, T24I, A90S, G120V, K127R, P142S, A152S, I157T, Q163P, P168S, R185C, R191L, S193I, R203M, A208V, A211V, S232T, S235F, G243S, V270L, M317V, S327L, A336V, D348H, T366I, E367K, D377Y, P383L, T391I, A398S, D401Y, D402Y.
				0.002	G25V, D103E, A134V, D144H, G179V, P199S, M234I, Q289H, P368A, K370Q, D371Y.
				0.003	E367V.
				0.004	P13L, Q28E, D103Y, T205I, R209I.
				0.005	G34W, G212V.
				0.006	E367G.
				0.007	L139F, S194L.
				0.008	G18V, A119S.
				0.019	S187L.
				0.038	S202N.
				0.071	Q384H.
				0.556	G204R.
				0.562	R203K.
Asia	8406	303	207	<0,10%	S2P, D3Y, P6S, P6T, P6L, Q7K, N11D, N11S, A12T, A12S, P13T, P13S, P13R, R14L, G18C, G19R, P20L, S21P, D22Y, D22N, D22G, S23P, T24I, T24N, S26I, Q28L, Q28R, G30V, E31Q, R32H, G34E, G34W, A35G, R36L, S37L, R40C, R41Q, A50V, A50E, A55S, D63N, K65I, K65T, P67L, V72L, P80R, D81H, D81Y, Q83R, Y86F, A90V, A90S, T91I, R92S, R95L, G97S, G99C, D103N, A119V, G120R, P122L, D128Y, G129S, A134V, T135I, E136D, …
				0.001	Q9H, N11T, T16M, G18V, G18S, G25C, S33I, D103Y, A119S, L139F, D144Y, A152S, S183Y, R185C, S186P, S186F, S188P, R195K, A208G, R209I, M210I, A211S, G212V, G215V, Q229H, G238C, T247S, H300Y, S327L, T334I, T362I, T366I, K373N, D377G, K387R, T393I, A414S.
				0.002	P162L, S193I, R195I, A211V, P344S, D377Y.
				0.003	S197L, P199S, M234I.
				0.004	T205I.
				0.005	A12G.
				0.01	D401Y.
				0.025	S202N.
				0.064	S194L.
				0.15	P13L.
				0.268	G204R.
				0.269	R203K.
Europe	57699	613	304	<0,10%	S2Y, D3Y, D3G, D3L, D3N, G5R, G5V, G5E, P6T, P6S, Q7K, Q7R, N8T, N8S, R10L, R10P, R10Q, N11S, A12V, A12T, P13S, P13R, P13H, P13T, R14L, R14C, R14P, I15L, T16M, T16A, G18C, G18V, G18S, G19R, G19E, G19V, P20L, P20S, S21L, S21P, D22Y, D22N, S23P, S23L, T24I, G25C, G25V, S26I, S26C, N27K, N27Y, Q28H, Q28R, N29K, N29Y, N29T, G30R, G30V, G30A, R32L, R32C, R32H, S33G, S33N, G34W, G34E, G34V, A35T, A35S,…
				0.001	P6L, Q7H, Q9H, T24N, A35V, R40C, A55S, A119S, A119V, L139F, D144Y, P151L, A156S, P168S, G179C, S180I, R185C, S187L, S190G, R191C, R195I, N196S, S202N, S206P, S206F, R209I, R209T, M210I, A211V, G212C, T247I, A252S, I292T, H300Y, T325I, T334I, D340N, D348H, A359S, T362I, K373R, K374N, P383S, P383L, R385K, K387N, T391I.
				0.002	P13L, D22G, S33I, S37P, V72I, D81Y, I84V, S186Y, P199L, P199S, T205I, M234I, P365S, A376T.
				0.003	D128Y, S190I, G204L, D401Y.
				0.005	D377Y.
				0.008	A398V.
				0.012	S193I, A220V.
				0.016	S188L.
				0.023	S197L.
				0.028	S194L.
				0.032	D103Y.
				0.441	G204R.
				0.446	R203K.
North America	23421	438	260	<0,10%	S2F, D3G, D3L, D3Y, N4D, G5E, P6L, P6T, Q7K, Q7H, Q9H, R10Q, R10P, N11I, N11S, A12T, A12V, A12S, P13S, P13R, R14H, R14C, R14L, R14G, G18A, G19V, G19E, G19R, P20L, P20S, D22Y, D22G, D22E, S23L, S23T, T24I, G25D, S26I, S26G, N27K, Q28H, Q28R, N29S, N29Y, G30V, G30A, E31K, E31D, R32C, R32L, G34L, G34E, A35T, R36Q, R36L, S37L, S37P, Q39L, R40L, R40C, Q43R, Q43L, G44R, P46S, A55S, L56F, E62K, D63N, R6…
				0.001	P13T, S33I, P67T, L139F, D144Y, A152S, A182S, R185C, S187L, S188L, S190R, S193I, S194A, S197L, P199S, R203S, S206F, P207S, S232I, G238C, A251V, E280V, Q289H, P326S, S327L, T334K, T362I, P364L, D371Y, E378A, T379I, R385I, T391I, A398V, D401Y, D402Y.
				0.002	P13L, G18C, R32H, A35S, E62V, P207L, R209I, R209K, Q229H, M234I, I292T, T366R, P368S, D377Y, P383L.
				0.003	G30R, S180I, S190I, S202N.
				0.004	G34W, T393I.
				0.006	T205I.
				0.008	P67S, P199L, A208G.
				0.012	S183Y.
				0.014	S235F.
				0.043	S194L.
				0.121	R203K, G204R.
South America	1313	61	60	0.001	Q7K, Q9H, I15V, G19V, P20L, S21L, S21T, D22G, Q28R, R32H, R41L, N48I, V72I, T76I, S79C, P80S, A119T, P122L, A134V, T135I, L139S, D144Y, S188P, S193C, S194L, P199L, M234I, Q242R, S250P, A251V, Q294L, T296I, S327L, P344S, P364S, K373N, T379I, R385I, T393I, D402H.
				0.002	P13L, G25D, S37P, D103Y, R185C, R191C, T205I, R209I, G238C, A252S, P279L, T362I, P365L, D377Y.
				0.004	G243C, K375N.
				0.008	Q160K.
				0.015	S197L.
				0.251	I292T.
				0.604	R203K, G204R.
Oceania	6575	150	129	<0,10%	G5R, P6L, N8S, A12T, R14L, G19E, P20S, D22Y, S26I, G30V, R32L, A35V, R40C, P46S, N48T, A55S, G60R, G60V, P67S, R68L, Q70H, D82Y, R89K, A90V, A90S, R95L, G96C, D103Y, G114V, A125V, D128E, A134V, A134S, D144Y, A152V, I157T, L161F, Q163K, P168L, P168S, R177K, S180I, S180G, A182S, S184C, R185C, S186F, S190G, R191L, R191C, S193I, R195K, S197P, S197F, T198I, R203M, R203S, T205S, A208G, R209I, R209K, M2…
				0.001	D81Y, A119V, D144H, P151L, S188P, P199S, P199T, T205I, G215D, N228Y, M234I, S255F, T271I, I292T, T334I, A359S, P368L, P383S, D401Y.
				0.002	L139F, S190I, S202N.
				0.006	S194L.
				0.008	S183Y.
				0.009	D22G.
				0.027	L230F.
				0.048	S197L.
				0.057	P13L.
				0.659	R203K, G204R.

## Sheet: S
Region	Total sequences	Number of found aa changes	Number of mutated aa residues	Frequency of aa changes	Aa changes
Global	101100	2671	1132	<0,10%	M1I, F2L, V3G, V3I, V3F, F4S, L5I, V6I, L7S, L7I, L7V, L8F, L8V, L8W, P9S, P9Q, P9T, P9L, L10V, L10I, V11F, V11I, V11A, S12P, S12C, S13I, S13N, Q14H, Q14R, C15F, V16I, V16F, N17Y, N17K, L18I, T19K, T19I, T19P, T19S, T20I, T20A, T20N, T20S, R21K, R21T, R21S, T22I, T22P, T22A, Q23K, L24S, L24I, P25S, P25L, P25T, P26S, P26H, P26R, A27S, A27V, A27T, Y28F, Y28H, T29A, T29S, T29N, N30D, N30H, N30I, N30…
				0.001	V6F, S12F, T22N, P26L, T29I, S50L, G75V, T76I, T95I, S98F, D138H, H146Y, M153I, L176F, I197V, V213L, R214L, D215G, S221L, S254F, S255F, A262S, E281V, V308L, A344S, V367F, T478I, P479S, A522V, T572I, E583D, Q613H, V622F, T632N, H655Y, Q675R, P681L, A688V, S698L, A701V, T723I, G769V, A829T, A845S, A846V, R847K, T859I, S939F, A1020V, V1068F, A1078S, D1084Y, F1121L, G1124V, P1162L, Q1208H, G1219V, G1…
				0.002	H49Y, D80Y, Q675H, Q677H, K1073N, I1225F.
				0.003	L54F, A879S, V1176F.
				0.004	D253G, D839Y.
				0.005	L18F.
				0.007	A222V, P1263L.
				0.008	L5F, R21I, N439K, D936Y.
				0.041	S477N.
				0.815	D614G.
Africa	2305	228	204	<0,10%	M1I, V11F, S13I, Q14H, T20I, T22I, T29I, H69Y, G75R, N81Y, V90F, V90L, E96D, R102I, G103S, W104G, T108I, C136F, D138Y, F140L, G142V, W152R, W152L, S155T, E156D, A163V, L176F, D178N, E180G, G181R, N188I, I197V, D198G, D215H, L216F, L242F, A243V, P251S, F275L, Y279N, E281V, A288T, G311E, Q314R, P330S, C336R, A344S, S359N, S373L, P384L, R408K, G413E, D427N, Y453F, L455F, S459Y, E465D, I468V, S469P, …
				0.001	S12F, L18F, P26S, H49Y, L54F, V70F, D80Y, E96Q, N121T, D138H, R214L, R214H, S221L, T240I, G261C, G261V, A262S, T302A, V382L, P384S, I402V, R408I, I468T, A570S, E583D, Q675R, A684V, A701V, N751Y, E780Q, I805M, V826L, A845S, D936Y, S939F, G946R, A1020S, N1074H, N1134H, L1141F, E1150D, D1153A, P1162L, D1163Y, K1191N, L1203F, K1205N, G1219C, M1237I, V1264L.
				0.002	V6F, L8F, A27S, T95I, S98F, A222V, A522V, V622F, H655Y, T676P, I794F, P809S, S810L, L821V, L938I, V1122L, P1162S, G1219V, L1244F, D1260Y.
				0.003	A243S, N658D, A846V, D1084Y, P1263L.
				0.004	P812L.
				0.005	A653V.
				0.007	L5F, Q677H, A1078S.
				0.008	G769V.
				0.01	A879S.
				0.023	A688V.
				0.947	D614G.
Asia	8486	1171	833	<0,10%	F2L, F4S, L7S, L7I, P9S, Q14H, C15F, T20I, T20A, R21I, T22P, P26S, P26L, P26H, A27S, A27V, Y28F, Y28H, T29A, N30D, N30H, N30I, F32I, G35V, Y38G, Y38C, P39L, D40T, K41S, V42Y, F43L, R44W, S46L, S46P, V47I, V47L, H49C, P57S, F59S, V62L, V62G, A67V, A67S, I68R, H69Y, V70F, N74K, G75A, G75V, G75S, G75H, T76N, R78K, F79I, D80Y, D80G, D80E, N81D, V83F, L84P, P85T, F86P, F86Y, F86S, N87G, N87C, D88H, D8…
				0.001	S13I, L18F, N74D, T76I, S98F, D138H, M153T, M153I, G181A, V213L, V213A, S255F, A262S, T307I, V367F, A520S, K558N, D574Y, H655Y, Q690H, A701T, E702Q, A706S, R765L, G769V, T791I, A845S, D848G, L849P, A879S, D936Y, S939F, S943P, A1022S, A1078S, H1101Y, G1124V, P1162S, V1176F, G1219C, V1228L, M1229I, M1237I, C1243F, C1247Y, S1249Y, G1251V, P1263L.
				0.002	T22I, T29I, K77M, R78M, T95I, D138Y, G261S, T572I, Q613H, V622F, Q675H, A771S, P812L, H1083Q, D1084Y, D1118V.
				0.003	S50L, E583D.
				0.004	L8V, Q677H.
				0.005	H49Y.
				0.006	L5F.
				0.008	S12F.
				0.013	L54F.
				0.013	A829T.
				0.577	D614G.
Europe	57351	1525	840	<0,10%	F2L, V3G, V3I, V3F, V6F, V6I, L8F, L8V, L8W, P9Q, P9T, P9S, P9L, L10V, V11I, V11F, S13I, S13N, Q14H, Q14R, C15F, V16I, N17Y, T19K, T19I, T19P, T20N, T20S, R21K, R21T, T22I, T22N, T22A, L24S, P25L, P25T, P26S, P26R, P26H, A27V, A27S, A27T, Y28H, T29S, T29N, T29A, N30T, S31P, S31F, F32L, F32V, F32Y, T33A, T33I, T33S, V36F, P39L, R44K, S45P, S46L, S46A, V47I, V47F, L48F, S50L, T51I, Q52L, Q52H, P57T…
				0.001	S12F, T20I, P25S, H49Y, V70F, T73I, T76I, T95I, R102I, H146Y, M153I, L176F, M177I, V213L, R214L, D215H, D215G, H245Y, S254F, S255F, W258L, G261V, A262S, V289I, A344S, V367F, P479S, A522V, D574Y, E583D, Q613H, V615I, V622F, A626S, S640F, H655Y, Q677H, V687L, A688V, A701V, T716I, V826L, A831V, A845S, A845V, A846V, A846S, S939F, A1020V, A1078S, A1078V, D1084Y, D1146H, P1162L, D1163Y, G1167V, Q1208H,…
				0.002	P26L, T29I, D80Y, S98F, I197V, T478I, Q675H, T723I, G769V, F1121L.
				0.003	L54F, S477N, R847K, K1073N, I1225F.
				0.004	A879S.
				0.006	D839Y.
				0.008	L18F.
				0.009	L5F.
				0.01	P1263L.
				0.012	A222V.
				0.013	R21I, N439K.
				0.014	D936Y
				0.829	D614G
North America	24134	814	588	<0,10%	F2L, V3G, F4S, L5I, L7V, L8F, L8V, P9L, P9S, P9T, L10I, V11A, S12P, S12C, S12F, S13I, C15F, N17K, L18I, T19S, T20I, R21I, R21T, R21S, T22I, T22A, Q23K, L24S, P25L, P25S, P26L, P26S, A27V, A27T, Y28H, Y28F, S31F, F32L, T33I, R34C, S46L, S46A, S50L, T51I, Q52H, L54W, F55C, F55I, P57L, F58S, F58L, V62L, A67S, A67V, H69Q, H69D, H69R, H69Y, V70F, S71F, G72R, G72V, G72E, T73I, N74K, G75R, G75D, K77N, R…
				0.001	Q14H, L18F, A27S, T29I, Q52L, L54F, T76I, D80Y, T95I, D111N, D138H, Y145H, H146Y, S151I, M153I, E180V, D215Y, L216F, F220L, A222V, S254F, S256L, A263T, T307I, V308L, P330S, A344S, A520S, E554D, P631S, H655Y, M731I, T732A, V785I, T791K, A845S, N856S, L922F, D936Y, D936H, S940F, F1052L, L1063F, A1078S, H1101Y, V1122L, I1172V, M1229I, S1252F.
				0.002	V6F, T22N, H49Y, G75V, S221L, V483A, T572I, E583D, Q677H, P681L, S698L, E780Q, T859I, S939F, N1187Y, G1219C, V1228L.
				0.003	P1263L.
				0.004	Q675R.
				0.009	L5F.
				0.017	D253G.
				0.843	D614G.
South America	1579	129	120	0.001	S12F, L24I, P26S, A27S, S46L, H49Y, A67V, I68M, I68K, N74K, G75V, T76I, L84Q, T95I, S98F, D111N, Y145C, H146N, K147N, E154Q, S155I, L176F, D178N, G181V, Q183R, R190G, D198Y, H207P, S221L, D253Y, S254F, T299I, E309Q, T345I, A348S, V367L, T376I, V382L, D398Y, N437S, V445F, I468T, T470A, G476S, S477I, N501Y, A520S, E554A, N556S, K558N, P561H, F565L, T573I, L585F, S596R, A647S, N658K, Q675H, Q677H, R…
				0.002	V16F, H207Q, A288S, T719I, S939F, V1068H.
				0.003	L5F, I197V, T747I, V1104L.
				0.004	P1263L.
				0.01	K1191N.
				0.015	I119V.
				0.053	E281V.
				0.182	V1176F.
				0.93	D614G.
Oceania	7245	239	219	<0,10%	V3F, S12F, C15F, L18F, R21I, T22I, A27S, A27V, Y28H, L54F, P57L, H66Y, A67S, S71P, G75C, T76I, R78K, D80A, V83F, A93V, T95I, S98F, I101V, S112L, T124I, I128F, F135L, D138Y, F140V, L141F, Y145H, H146Q, M153I, F157L, N165H, L176F, M177I, E180K, G181R, F186L, R214L, A222V, L242F, A243S, H245Y, S247R, D253G, S256P, W258C, G261R, A263S, F275L, T284I, A288S, E298K, T299I, T307I, V308L, E309Q, E309A, W3…
				0.001	R21T, T29I, H49Y, S71F, D138H, S221L, S255F, W258L, A262T, P330A, E554D, D574Y, A623V, Q677H, S704L, V772F, D808E, P812S, T859I, D936Y, V1122L, V1176F, C1254F, D1260N.
				0.002	G35V, S50L, S254F, S698L, D839Y, M1229I.
				0.003	L5F, P1263L.
				0.004	A626V.
				0.005	G485R, N501Y.
				0.006	T778I.
				0.01	T632N.
				0.011	V1068F.
				0.013	G1124V.
				0.568	S477N.
				0.82	D614G.
