# Supplementary material for: Evolution of SARS-CoV-2 Envelope, Membrane, Nucleocapsid, and Spike Structural Proteins from the Beginning of the Pandemic to September 2020: A Global and Regional Approach by Epidemiological Week
Source: Viruses. 2021 Feb 4;13(2):243. doi: 10.3390/v13020243 (PMC7913946; doi:10.3390/v13020243)
Supplement: Supplementary file 1 [file viruses-13-00243-s001.zip › Supplementary_Table_3.xlsx]

## Sheet: Hoja1
S3 Table. Available sequences per country and SARS-CoV-2 structural proteins.
	Number of Spike/Envelope/Membrane/Nucleocapsid sequences
	Europe (S/E/M/N)	Asia (S/E/M/N)	North America (S/E/M/N)	South America (S/E/M/N)	Africa (S/E/M/N)	Oceania (S/E/M/N)
Countries with sequences (Number of S/E/M/N Sequences)	Andorra (1/1/1/1)	Bahrain (37/37/37/34)	Belize (4/4/4/4)	Argentina (38/38/38/30)	Algeria (3/3/3/3)	Australia (6981/6338/7148/6320)
(Number of S/E/M/N	Austria (422/424/425/418)	Bangladesh (324/324/322/320)	Canada (1606/1601/1629/1575)	Brazil (834/740/848/688)	Benin (12/12/12/11)	Guam (3/3/3/3)
Sequences)	Belgium (974/978/977/977)	Brunei (5/5/5/5)	Costa Rica (74/90/89/89)	Chile (166/167/167/161)	Cameroon (-/1/1/1)	New Zealand (261/259/262/252)
	Bosnia and Herzegovina (31/31/31/31)	Cambodia (1/1/1/1)	Cuba (2/2/2/2)	Colombia (167/172/173/172)	DRC (337/338/340/276)
	Bulgaria (15/15/15/15)	China (1080/1084/1092/1071)	Dominican Republic (7/5/8/6)	Ecuador (78/72/80/70)	Egypt (152/151/152/149)
	Croatia (15/15/15/15)	Georgia (21/21/21/20)	Guatemala (10/10/10/10)	Peru (177/171/175/105)	Gabon (4/4/4/4)
	Cyprus (8/8/8/8)	India (2514/2702/2719/2634)	Jamaica (8/8/8/7)	Suriname (68/66/70/60)	Gambia (15/17/17/17)
	Czech Republic (65/63/65/64)	Indonesia (59/58/59/59)	Mexico (120/121/120/120)	Uruguay (49/27/49/24)	Ghana (49/51/52/48)
	Denmark (725/735/732/698)	Iran (7/7/6/6)	Panama (203/164/290/1)	Venezuela (2/3/3/3)	Kenya (87/53/102/50)
	Faroe Islands (7/14/14/14)	Israel (378/391/389/307)	Puerto Rico (12/13/13/10)		Madagascar (2/2/2/2)
	Finland (267/267/267/267)	Japan (609/609/610/606)	USA (22088/21890/22370/21597)		Mali (21/21/21/21)
	France (468/466/469/465)	Jordan (25/4/28/4)			Morocco (47/48/48/47)
	Germany (434/442/442/443)	Kazakhstan (53/53/53/50)			Nigeria (71/73/69/81)
	Greece (126/131/131/124)	Kuwait (8/8/8/8)			Réunion (4/4/4/4)
	Hungary (84/85/85/84)	Lebanon (14/14/15/13)			Senegal (125/132/136/113)
	Iceland(568/565/568/513)	Malaysia (114/115/115/112)			Sierra Leone (11/11/11/11)
	Ireland (195/196/196/196)	Mongolia (1/1/1/-)			South Africa (1336/1405/1408/1377)
	Italy (322/324/327/293)	Myanmar (2/2/2/2)			Tunisia (8/8/8/7)
	Latvia (134/134/134/134)	Nepal (1/1/1/1)			Uganda (20/20/20/20)
	Lithuania (2/2/2/2)	Oman (200/196/191/185)			Zambia (1/1/1/1)
	Luxembourg (271/271/271/269)	Pakistan (9/9/9/9)
	Moldova (9/9/8/8)	Philippines (22/23/22/13)
	Montenegro (12/12/12/12)	Qatar (15/16/16/16)
	Netherlands (2226/2267/2264/2188)	Saudi Arabia (550/557/559/553)
	North Macedonia (32/32/32/32)	Singapore (994/990/1001/969)
	Norway (135/136/138/133)	South Korea (826/825/827/825)
	Poland (114/114/114/113)	Sri Lanka (7/12/12/11)
	Portugal (1595/1592/1644/1547)	Taiwan (124/125/126/118)
	Romania (111/112/112/111)	Thailand (229/229/227/228)
	Russia (421/414/421/416)	Timor-Leste (18/17/17/17)
	Serbia (19/19/19/19)	United Arab Emirates (153/153/153/153)
	Slovakia (4/3/4/4)	Vietnam (86/86/86/56)
	Slovenia (5/5/5/5)
	Spain (3966/3994/3995/3969)
	Sweden (637/636/636/637)
	Switzerland (1731/1757/1761/1742)
	Turkey (188/164/187/191)
	Ukraine (49/49/50/50)
	UK:(40963/41900/42142/41491)
	England (27949/28612/28801/28315)
	Northern Ireland (1372/1380/1395/1380)
	Scotland (6245/6283/6313/6220)
	Wales (5395/5623/5631/5574)
	UK not specified (2/2/2/2)
TOTAL	(57351/58382/58719/57699)	(8486/8675/8730/8406)	(24134/23908/24543/23421)	(1579/1456/1603/1313)	(2305/2355/2411/2243)	(7245/6600/7413/6575)
