# Supplementary material for: Evolution of SARS-CoV-2 Envelope, Membrane, Nucleocapsid, and Spike Structural Proteins from the Beginning of the Pandemic to September 2020: A Global and Regional Approach by Epidemiological Week
Source: Viruses. 2021 Feb 4;13(2):243. doi: 10.3390/v13020243 (PMC7913946; doi:10.3390/v13020243)
Supplement: Supplementary file 1 [file viruses-13-00243-s001.zip › Supplementary_Table_4.xlsx]

## Sheet: R203K+G204R
S4 Table. Number and frequency of sequences carrying R203K+G204R aa change combination in N protein by epiweek in each geographic region and country.
	Country	Number of sequences*	K203+R204 sequences	K203+R204 frequency	* Num. of sequences with valid aa in positions 203 and 204
North America	Belize	4	2	0.5
	Canada	1532	236	0.154047
	Costa Rica	89	25	0.280899
	Cuba	2	0	0
	Dominican Republic	6	0	0
	Guatemala	10	0	0
	Jamaica	7	0	0
	Mexico	119	23	0.193277
	Panama	1	0	0
	Puerto Rico	10	1	0.1
	USA	21503	2517	0.117053
South America	Argentina	30	19	0.633333
	Brazil	683	606	0.887262
	Chile	161	42	0.26087
	Colombia	167	19	0.113772
	Ecuador	70	30	0.428571
	Peru	103	62	0.601942
	Suriname	60	4	0.0666667
	Uruguay	24	3	0.125
	Venezuela	3	1	0.333333
Africa	Algeria	3	0	0
	Benin	11	0	0
	Cameroon	1	0	0
	DRC	276	30	0.108696
	Egypt	124	5	0.0403226
	Gabon	4	0	0
	Gambia	16	14	0.875
	Ghana	46	13	0.282609
	Kenya	50	11	0.22
	Madagascar	2	0	0
	Mali	21	0	0
	Morocco	42	13	0.309524
	Nigeria	80	31	0.3875
	Réunion	4	0	0
	Senegal	113	18	0.159292
	Sierra Leone	11	2	0.181818
	South Africa	1355	1072	0.791144
	Tunisia	7	0	0
	Uganda	18	7	0.388889
	Zambia	1	1	1
Oceania	Australia	6194	4212	0.680013
	Guam	3	0	0
	New Zealand	238	28	0.117647
Asia	Bahrain	34	5	0.147059
	Bangladesh	320	278	0.86875
	Brunei	5	0	0
	Cambodia	1	0	0
	China	1070	101	0.0943925
	Georgia	20	2	0.1
	India	2615	941	0.359847
	Indonesia	58	7	0.12069
	Iran	6	0	0
	Israel	301	58	0.192691
	Japan	605	271	0.447934
	Jordan	4	0	0
	Kazakhstan	50	1	0.02
	Kuwait	5	1	0.2
	Lebanon	13	3	0.230769
	Malaysia	111	7	0.0630631
	Myanmar	2	0	0
	Nepal	1	0	0
	Oman	185	139	0.751351
	Pakistan	9	0	0
	Philippines	10	1	0.1
	Qatar	11	0	0
	Saudi Arabia	552	111	0.201087
	Singapore	969	79	0.0815273
	South Korea	820	85	0.103659
	Sri Lanka	11	2	0.181818
	Taiwan	118	18	0.152542
	Thailand	224	23	0.102679
	Timor-Leste	16	0	0
	United Arab Emirates	153	65	0.424837
	Vietnam	56	38	0.678571
Europe	Andorra	1	0	0
	Austria	411	143	0.347932
	Belgium	974	315	0.323409
	Bosnia and Herzegovina	31	3	0.0967742
	Bulgaria	15	9	0.6
	Croatia	15	4	0.266667
	Cyprus	8	7	0.875
	Czech Republic	63	38	0.603175
	Denmark	695	46	0.0661871
	Faroe Islands	14	0	0
	Finland	266	12	0.0451128
	France	465	29	0.0623656
	Germany	440	118	0.268182
	Greece	124	77	0.620968
	Hungary	84	43	0.511905
	Iceland	513	123	0.239766
	Ireland	196	48	0.244898
	Italy	289	126	0.435986
	Latvia	134	60	0.447761
	Lithuania	2	0	0
	Luxembourg	269	17	0.063197
	Moldova	8	3	0.375
	Montenegro	12	10	0.833333
	Netherlands	2188	489	0.223492
	North Macedonia	32	25	0.78125
	Norway	133	26	0.195489
	Poland	112	67	0.598214
	Portugal	1524	754	0.494751
	Romania	111	29	0.261261
	Russia	416	306	0.735577
	Serbia	19	13	0.684211
	Slovakia	4	0	0
	Slovenia	5	0	0
	Spain	3937	453	0.115062
	Sweden	637	260	0.408163
	Switzerland	1661	614	0.369657
	Turkey	190	87	0.457895
	Ukraine	50	14	0.28
	UK:	41248	20928	0.50737
	England	28117	15789	0.561546
	Northern Ireland	1375	1047	0.761455
	Scotland	6210	1430	0.230274
	Wales	5544	2661	0.479978
	UK not specified	2	1	0.5

## Sheet: Epiweek N.A.
Epiweek	Country	Number of sequences*	K203+R204 sequences	K203+R204 frequency	* Num. of sequences with valid aa in positions 203 and 204
4	Canada	2	0	0
4	USA	7	0	0
5	Canada	7	0	0
5	USA	7	0	0
6	USA	1	0	0
7	USA	2	0	0
8	Canada	2	0	0
8	USA	25	0	0
9	Canada	2	0	0
9	Dominican Republic	1	0	0
9	Mexico	3	3	100
9	USA	84	3	3.571
10	Belize	1	1	100
10	Canada	21	1	4.762
10	Costa Rica	4	0	0
10	Dominican Republic	1	0	0
10	Mexico	1	0	0
10	Panama	1	0	0
10	USA	356	6	1.685
11	Canada	135	21	15.556
11	Costa Rica	10	0	0
11	Guatemala	1	0	0
11	Jamaica	4	0	0
11	Mexico	19	3	15.789
11	USA	1116	61	5.466
12	Belize	1	1	100
12	Canada	192	40	20.833
12	Costa Rica	27	2	7.407
12	Cuba	1	0	0
12	Guatemala	9	0	0
12	Jamaica	3	0	0
12	Mexico	5	0	0
12	USA	2077	94	4.526
13	Belize	1	0	0
13	Canada	460	87	18.913
13	Costa Rica	5	1	20
13	Cuba	1	0	0
13	Mexico	5	0	0
13	Puerto Rico	8	1	12.5
13	USA	2411	89	3.691
14	Canada	483	43	8.903
14	Costa Rica	5	0	0
14	Mexico	1	0	0
14	Puerto Rico	2	0	0
14	USA	2505	88	3.513
15	Belize	1	0	0
15	Canada	118	13	11.017
15	Costa Rica	2	0	0
15	USA	1410	45	3.191
16	Canada	29	6	20.69
16	Mexico	1	0	0
16	USA	1135	52	4.581
17	Canada	11	2	18.182
17	Mexico	14	0	0
17	USA	1135	90	7.93
18	Canada	36	8	22.222
18	Mexico	21	2	9.524
18	USA	1247	112	8.982
19	Dominican Republic	4	0	0
19	Mexico	2	0	0
19	USA	969	114	11.765
20	Canada	8	1	12.5
20	Mexico	2	0	0
20	USA	1032	108	10.465
21	Canada	11	8	72.727
21	Mexico	2	0	0
21	USA	779	120	15.404
22	Canada	3	2	66.667
22	Mexico	7	1	14.286
22	USA	784	216	27.551
23	Canada	3	2	66.667
23	Mexico	1	0	0
23	USA	630	307	48.73
24	Canada	4	1	25
24	Costa Rica	5	5	100
24	Mexico	2	2	100
24	USA	649	293	45.146
25	Canada	2	1	50
25	Costa Rica	9	5	55.556
25	Mexico	3	1	33.333
25	USA	630	251	39.841
26	Costa Rica	1	1	100
26	Mexico	5	0	0
26	USA	448	96	21.429
27	Costa Rica	13	9	69.231
27	Mexico	4	0	0
27	USA	333	66	19.82
28	Costa Rica	8	2	25
28	Mexico	2	0	0
28	USA	366	63	17.213
29	Canada	1	0	0
29	USA	299	45	15.05
30	USA	210	37	17.619
31	Mexico	8	4	50
31	USA	239	53	22.176
32	Mexico	11	7	63.636
32	USA	153	27	17.647
33	USA	148	13	8.784
34	USA	150	31	20.667
35	USA	38	8	21.053
36	USA	55	21	38.182
37	USA	51	7	13.725

## Sheet: Epiweek S.A.
Epiweek	Country	Number of sequences*	K203+R204 sequences	K203+R204 frequency	* Num. of sequences with valid aa in positions 203 and 204
9	Brazil	5	0	0
10	Argentina	2	2	100
10	Brazil	14	9	64.286
10	Chile	8	1	12.5
10	Colombia	1	1	100
10	Peru	1	1	100
11	Brazil	17	10	58.824
11	Chile	34	8	23.529
11	Colombia	17	0	0
11	Ecuador	1	0	0
11	Peru	6	3	50
11	Uruguay	1	0	0
12	Argentina	1	0	0
12	Brazil	44	32	72.727
12	Chile	64	13	20.312
12	Colombia	22	3	13.636
12	Peru	27	10	37.037
12	Uruguay	9	0	0
13	Argentina	4	1	25
13	Brazil	71	65	91.549
13	Chile	25	2	8
13	Colombia	24	0	0
13	Peru	2	1	50
14	Argentina	11	5	45.455
14	Brazil	150	127	84.667
14	Chile	15	8	53.333
14	Colombia	71	10	14.085
14	Ecuador	1	0	0
14	Peru	9	6	66.667
14	Venezuela	1	1	100
15	Argentina	3	3	100
15	Brazil	92	87	94.565
15	Chile	3	2	66.667
15	Colombia	11	2	18.182
15	Ecuador	3	2	66.667
15	Uruguay	5	0	0
15	Venezuela	2	0	0
16	Argentina	5	4	80
16	Brazil	112	112	100
16	Colombia	3	0	0
16	Ecuador	8	5	62.5
17	Argentina	2	2	100
17	Brazil	78	77	98.718
17	Colombia	2	0	0
17	Uruguay	4	0	0
18	Brazil	49	48	97.959
18	Chile	12	8	66.667
18	Colombia	7	3	42.857
18	Ecuador	1	0	0
18	Peru	4	3	75
18	Suriname	4	0	0
19	Argentina	2	2	100
19	Brazil	26	25	96.154
19	Colombia	3	0	0
19	Peru	16	11	68.75
19	Suriname	1	0	0
20	Brazil	5	3	60
20	Colombia	1	0	0
21	Ecuador	3	2	66.667
21	Uruguay	2	0	0
22	Brazil	6	6	100
22	Uruguay	3	3	100
23	Brazil	3	3	100
23	Ecuador	1	1	100
23	Suriname	2	0	0
24	Peru	1	0	0
25	Colombia	1	0	0
25	Ecuador	3	1	33.333
25	Peru	12	7	58.333
25	Suriname	3	0	0
26	Peru	1	1	100
26	Suriname	27	0	0
27	Brazil	1	1	100
27	Ecuador	16	9	56.25
27	Peru	24	19	79.167
28	Colombia	1	0	0
28	Suriname	2	1	50
29	Colombia	1	0	0
29	Ecuador	2	0	0
29	Suriname	18	3	16.667
30	Brazil	9	0	0
30	Ecuador	2	0	0
30	Suriname	1	0	0
31	Ecuador	1	0	0
32	Ecuador	7	4	57.143
32	Suriname	2	0	0
33	Brazil	1	1	100
33	Ecuador	14	4	28.571
34	Colombia	2	0	0
34	Ecuador	7	2	28.571

## Sheet: Epiweek Africa
Epiweek	Country	Number of sequences*	K203+R204 sequences	K203+R204 frequency	* Num. of sequences with valid aa in positions 203 and 204
8	Nigeria	1	0	0
9	Morocco	1	0	0
9	Nigeria	1	1	100
9	Senegal	1	0	0
10	Algeria	2	0	0
10	Cameroon	1	0	0
10	Morocco	1	1	100
10	Senegal	3	0	0
10	South Africa	2	0	0
11	Algeria	1	0	0
11	DRC	1	0	0
11	Kenya	1	0	0
11	Senegal	8	0	0
11	South Africa	1	0	0
12	Benin	6	0	0
12	DRC	17	1	5.882
12	Egypt	2	0	0
12	Gambia	4	3	75
12	Kenya	4	1	25
12	Madagascar	1	0	0
12	Morocco	11	2	18.182
12	Senegal	11	0	0
12	South Africa	5	1	20
12	Tunisia	2	0	0
12	Zambia	1	1	100
13	Benin	2	0	0
13	DRC	12	2	16.667
13	Gabon	4	0	0
13	Ghana	13	2	15.385
13	Kenya	7	1	14.286
13	Madagascar	1	0	0
13	Nigeria	7	0	0
13	Reunion	3	0	0
13	Senegal	1	0	0
13	South Africa	12	2	16.667
13	Tunisia	2	0	0
13	Uganda	7	3	42.857
14	Benin	1	0	0
14	Gambia	1	1	100
14	Ghana	9	1	11.111
14	Kenya	9	4	44.444
14	Morocco	6	0	0
14	Nigeria	15	0	0
14	Reunion	1	0	0
14	Senegal	5	0	0
14	Sierra Leone	4	2	50
14	South Africa	43	5	11.628
14	Tunisia	3	0	0
14	Uganda	5	4	80
15	DRC	22	8	36.364
15	Kenya	8	4	50
15	Mali	11	0	0
15	Morocco	2	1	50
15	Nigeria	1	0	0
15	Senegal	2	1	50
15	Sierra Leone	4	0	0
15	South Africa	28	4	14.286
16	Benin	2	0	0
16	DRC	33	2	6.061
16	Egypt	1	1	100
16	Kenya	8	1	12.5
16	Mali	10	0	0
16	Morocco	3	0	0
16	Senegal	6	0	0
16	Sierra Leone	1	0	0
16	South Africa	1	0	0
17	DRC	40	0	0
17	Gambia	1	0	0
17	Ghana	1	0	0
17	Kenya	9	0	0
17	Morocco	12	4	33.333
17	Nigeria	8	5	62.5
17	Senegal	15	3	20
17	Sierra Leone	1	0	0
17	South Africa	2	2	100
17	Uganda	1	0	0
18	DRC	45	4	8.889
18	Egypt	34	2	5.882
18	Gambia	4	4	100
18	Kenya	3	0	0
18	Morocco	1	1	100
18	Nigeria	2	0	0
18	Sierra Leone	1	0	0
18	South Africa	10	2	20
18	Uganda	5	0	0
19	DRC	19	6	31.579
19	Egypt	4	1	25
19	Gambia	6	6	100
19	Morocco	2	2	100
19	Nigeria	6	3	50
19	South Africa	4	2	50
20	DRC	17	1	5.882
20	Egypt	10	0	0
20	Morocco	2	2	100
20	Nigeria	7	1	14.286
20	South Africa	17	13	76.471
21	DRC	25	6	24
21	Egypt	1	0	0
21	Ghana	10	6	60
21	Kenya	1	0	0
21	Nigeria	3	2	66.667
21	South Africa	7	6	85.714
22	DRC	45	0	0
22	Ghana	13	4	30.769
22	Morocco	1	0	0
22	Nigeria	3	1	33.333
22	Senegal	2	2	100
22	South Africa	18	12	66.667
23	Egypt	30	0	0
23	Nigeria	3	2	66.667
23	Senegal	3	0	0
23	South Africa	38	16	42.105
24	Nigeria	16	12	75
24	Senegal	35	6	17.143
24	South Africa	35	23	65.714
25	Egypt	1	1	100
25	Nigeria	6	4	66.667
25	Senegal	20	5	25
25	South Africa	123	108	87.805
26	South Africa	51	33	64.706
27	Nigeria	1	0	0
27	South Africa	129	106	82.171
28	Senegal	1	1	100
28	South Africa	103	90	87.379
29	South Africa	242	200	82.645
30	Egypt	7	0	0
30	South Africa	185	166	89.73
31	South Africa	161	151	93.789
32	South Africa	55	52	94.545
33	Egypt	11	0	0
33	South Africa	32	29	90.625
34	Egypt	23	0	0
34	South Africa	28	26	92.857
35	South Africa	23	23	100

## Sheet: Epiweek Oceania
Epiweek	Country	Number of sequences*	K203+R204 sequences	K203+R204 frequency	* Num. of sequences with valid aa in positions 203 and 204
4	Australia	8	0	0
5	Australia	10	0	0
6	Australia	4	0	0
8	Australia	2	0	0
9	Australia	7	0	0
9	New Zealand	1	0	0
10	Australia	19	0	0
10	New Zealand	5	3	60
11	Australia	100	9	9
11	New Zealand	5	1	20
12	Australia	427	65	15.222
12	Guam	1	0	0
12	New Zealand	52	3	5.769
13	Australia	614	90	14.658
13	Guam	2	0	0
13	New Zealand	62	6	9.677
14	Australia	354	40	11.299
14	New Zealand	64	3	4.688
15	Australia	229	30	13.1
15	New Zealand	22	0	0
16	Australia	117	21	17.949
16	New Zealand	12	4	33.333
17	Australia	32	1	3.125
17	New Zealand	15	8	53.333
18	Australia	54	2	3.704
19	Australia	44	0	0
20	Australia	52	7	13.462
21	Australia	31	5	16.129
22	Australia	52	17	32.692
23	Australia	18	10	55.556
24	Australia	45	34	75.556
25	Australia	90	70	77.778
26	Australia	211	200	94.787
27	Australia	431	421	97.68
28	Australia	851	845	99.295
29	Australia	1263	1263	100
30	Australia	879	878	99.886
31	Australia	45	45	100
32	Australia	5	3	60
33	Australia	2	0	0
34	Australia	8	8	100
35	Australia	9	9	100
36	Australia	7	7	100
37	Australia	3	3	100

## Sheet: Epiweek Asia
Epiweek	Country	Number of sequences*	K203+R204 sequences	K203+R204 frequency	* Num. of sequences with valid aa in positions 203 and 204
1	China	26	0	0
2	China	8	0	0
2	Thailand	3	0	0
3	China	22	0	0
3	Nepal	1	0	0
3	Thailand	4	0	0
4	China	147	0	0
4	Japan	5	0	0
4	Malaysia	3	0	0
4	Singapore	4	0	0
4	South Korea	1	0	0
4	Taiwan	3	0	0
4	Thailand	11	0	0
4	Vietnam	4	0	0
5	Cambodia	1	0	0
5	China	223	0	0
5	India	2	0	0
5	Japan	20	0	0
5	Malaysia	3	0	0
5	Singapore	7	0	0
5	South Korea	8	0	0
5	Taiwan	3	0	0
5	Thailand	8	0	0
5	United Arab Emirates	1	0	0
6	China	146	0	0
6	Malaysia	3	0	0
6	Saudi Arabia	2	0	0
6	Singapore	13	0	0
6	South Korea	12	0	0
6	Taiwan	5	0	0
6	Thailand	3	0	0
6	United Arab Emirates	1	0	0
7	China	86	0	0
7	Japan	26	0	0
7	Malaysia	2	0	0
7	Saudi Arabia	5	0	0
7	Singapore	7	0	0
7	South Korea	3	0	0
7	Vietnam	1	0	0
8	China	29	0	0
8	Japan	64	0	0
8	Saudi Arabia	5	0	0
8	Singapore	7	0	0
8	South Korea	65	0	0
8	Thailand	1	0	0
9	China	74	0	0
9	Georgia	2	0	0
9	Israel	1	0	0
9	Japan	16	0	0
9	Lebanon	1	0	0
9	Malaysia	4	0	0
9	Oman	2	0	0
9	Saudi Arabia	4	0	0
9	Singapore	2	0	0
9	South Korea	32	0	0
9	Taiwan	5	0	0
9	Thailand	4	0	0
9	United Arab Emirates	6	0	0
10	Bahrein	1	0	0
10	China	66	0	0
10	Georgia	1	1	100
10	India	9	2	22.222
10	Israel	2	2	100
10	Japan	52	0	0
10	Kuwait	4	0	0
10	Lebanon	2	1	50
10	Malaysia	4	0	0
10	Oman	1	0	0
10	Pakistan	1	0	0
10	Philippines	1	0	0
10	Saudi Arabia	2	0	0
10	Singapore	16	1	6.25
10	South Korea	8	0	0
10	Taiwan	3	0	0
10	Thailand	6	2	33.333
10	Vietnam	6	6	100
11	Bahrein	3	1	33.333
11	Brunei	3	0	0
11	China	27	1	3.704
11	Georgia	6	0	0
11	India	22	1	4.545
11	Indonesia	1	0	0
11	Iran	1	0	0
11	Israel	3	0	0
11	Japan	67	7	10.448
11	Lebanon	4	1	25
11	Malaysia	1	0	0
11	Oman	1	0	0
11	Pakistan	1	0	0
11	Saudi Arabia	8	3	37.5
11	Singapore	39	0	0
11	South Korea	26	0	0
11	Sri Lanka	1	1	100
11	Taiwan	13	2	15.385
11	Thailand	52	4	7.692
11	United Arab Emirates	11	0	0
11	Vietnam	10	9	90
12	Bahrein	4	0	0
12	Brunei	2	0	0
12	China	84	19	22.619
12	Georgia	1	0	0
12	India	29	5	17.241
12	Indonesia	4	0	0
12	Israel	59	12	20.339
12	Japan	59	15	25.424
12	Kuwait	1	1	100
12	Lebanon	6	1	16.667
12	Malaysia	12	1	8.333
12	Oman	16	4	25
12	Pakistan	1	0	0
12	Philippines	1	0	0
12	Saudi Arabia	21	13	61.905
12	Singapore	149	47	31.544
12	South Korea	26	4	15.385
12	Sri Lanka	2	0	0
12	Taiwan	52	10	19.231
12	Thailand	62	8	12.903
12	United Arab Emirates	7	5	71.429
12	Vietnam	15	6	40
13	China	28	8	28.571
13	Georgia	1	0	0
13	India	33	4	12.121
13	Indonesia	5	0	0
13	Iran	4	0	0
13	Israel	54	5	9.259
13	Japan	59	34	57.627
13	Kazakhstan	5	1	20
13	Malaysia	21	2	9.524
13	Oman	11	3	27.273
13	Philippines	7	0	0
13	Qatar	11	0	0
13	Saudi Arabia	35	6	17.143
13	Singapore	38	3	7.895
13	South Korea	30	9	30
13	Sri Lanka	1	1	100
13	Taiwan	16	4	25
13	Thailand	38	2	5.263
13	United Arab Emirates	5	0	0
13	Vietnam	9	6	66.667
14	Bahrein	5	0	0
14	Bangladesh	1	0	0
14	China	10	4	40
14	Georgia	2	1	50
14	India	120	4	3.333
14	Indonesia	5	0	0
14	Israel	71	11	15.493
14	Japan	137	121	88.321
14	Malaysia	22	2	9.091
14	Oman	7	4	57.143
14	Saudi Arabia	72	7	9.722
14	Singapore	49	3	6.122
14	South Korea	10	0	0
14	Sri Lanka	2	0	0
14	Taiwan	11	1	9.091
14	Thailand	27	6	22.222
14	Timor-Leste	1	0	0
14	United Arab Emirates	14	7	50
14	Vietnam	4	4	100
15	Bahrein	12	1	8.333
15	Bangladesh	1	1	100
15	China	1	1	100
15	India	68	7	10.294
15	Indonesia	2	0	0
15	Israel	22	6	27.273
15	Japan	59	57	96.61
15	Jordan	4	0	0
15	Malaysia	17	0	0
15	Oman	11	5	45.455
15	Saudi Arabia	76	17	22.368
15	Singapore	117	1	0.855
15	South Korea	4	1	25
15	Taiwan	1	0	0
15	Thailand	2	1	50
15	Timor-Leste	4	0	0
15	United Arab Emirates	5	0	0
15	Vietnam	6	6	100
16	Bangladesh	3	3	100
16	China	2	1	50
16	Georgia	1	0	0
16	India	84	13	15.476
16	Indonesia	1	0	0
16	Israel	20	2	10
16	Japan	8	5	62.5
16	Kazakhstan	7	0	0
16	Malaysia	1	0	0
16	Oman	15	10	66.667
16	Saudi Arabia	36	1	2.778
16	Singapore	110	0	0
16	South Korea	2	0	0
16	Taiwan	2	0	0
16	Timor-Leste	10	0	0
16	United Arab Emirates	12	4	33.333
16	Vietnam	1	1	100
17	Bangladesh	2	0	0
17	Georgia	1	0	0
17	India	93	24	25.806
17	Indonesia	2	0	0
17	Israel	14	3	21.429
17	Japan	10	10	100
17	Kazakhstan	7	0	0
17	Malaysia	1	0	0
17	Myanmar	1	0	0
17	Oman	23	21	91.304
17	Saudi Arabia	95	5	5.263
17	Singapore	52	0	0
17	Taiwan	2	0	0
17	United Arab Emirates	11	5	45.455
18	Bangladesh	6	4	66.667
18	Georgia	4	0	0
18	India	170	22	12.941
18	Iran	1	0	0
18	Israel	1	0	0
18	Japan	16	16	100
18	Kazakhstan	30	0	0
18	Oman	15	15	100
18	Saudi Arabia	19	8	42.105
18	Singapore	39	0	0
18	Sri Lanka	1	0	0
18	Taiwan	1	0	0
18	United Arab Emirates	19	9	47.368
19	Bangladesh	14	10	71.429
19	China	1	0	0
19	India	173	21	12.139
19	Indonesia	2	0	0
19	Japan	3	3	100
19	Malaysia	1	0	0
19	Oman	7	7	100
19	Saudi Arabia	11	0	0
19	Singapore	22	0	0
19	South Korea	37	0	0
19	United Arab Emirates	4	2	50
20	Bangladesh	17	9	52.941
20	China	1	0	0
20	India	191	82	42.932
20	Indonesia	2	0	0
20	Japan	2	2	100
20	Kazakhstan	1	0	0
20	Malaysia	1	1	100
20	Oman	7	7	100
20	Pakistan	1	0	0
20	SaudiArabia	7	2	28.571
20	Singapore	23	0	0
20	South Korea	29	0	0
20	United Arab Emirates	13	9	69.231
21	Bangladesh	20	19	95
21	China	1	0	0
21	India	257	64	24.903
21	Indonesia	1	1	100
21	Malaysia	11	0	0
21	Oman	41	36	87.805
21	Singapore	19	0	0
21	South Korea	33	2	6.061
21	United Arab Emirates	20	10	50
22	Bangladesh	11	8	72.727
22	India	293	105	35.836
22	Malaysia	2	1	50
22	Oman	12	12	100
22	Saudi Arabia	56	21	37.5
22	Singapore	12	0	0
22	South Korea	70	4	5.714
22	United Arab Emirates	6	3	50
23	Bangladesh	34	34	100
23	India	178	94	52.809
23	Israel	10	0	0
23	Japan	1	1	100
23	Malaysia	2	0	0
23	Oman	7	6	85.714
23	Pakistan	5	0	0
23	SaudiArabia	1	0	0
23	Singapore	28	0	0
23	South Korea	83	1	1.205
23	United Arab Emirates	8	4	50
24	Bangladesh	25	22	88
24	China	2	2	100
24	Georgia	1	0	0
24	India	255	92	36.078
24	Indonesia	3	0	0
24	Israel	1	0	0
24	Oman	8	8	100
24	SaudiArabia	44	0	0
24	Singapore	12	0	0
24	South Korea	43	1	2.326
24	United Arab Emirates	5	5	100
25	Bangladesh	62	59	95.161
25	India	329	183	55.623
25	Israel	4	2	50
25	Oman	1	1	100
25	SaudiArabia	20	13	65
25	Singapore	15	0	0
25	South Korea	52	3	5.769
25	Sri Lanka	1	0	0
25	United Arab Emirates	2	1	50
26	Bahrain	9	3	33.333
26	Bangladesh	10	7	70
26	China	2	1	50
26	India	29	6	20.69
26	Indonesia	3	0	0
26	Israel	2	1	50
26	Philippines	1	1	100
26	SaudiArabia	25	15	60
26	Singapore	32	0	0
26	South Korea	53	12	22.642
26	United Arab Emirates	1	1	100
27	China	3	1	33.333
27	India	7	1	14.286
27	Indonesia	1	1	100
27	Israel	8	6	75
27	Singapore	22	0	0
27	South Korea	55	9	16.364
27	United Arab Emirates	2	0	0
28	Bangladesh	40	37	92.5
28	China	38	31	81.579
28	India	37	5	13.514
28	Indonesia	2	0	0
28	Israel	1	0	0
28	Singapore	27	1	3.704
28	South Korea	36	9	25
29	Bangladesh	30	26	86.667
29	China	13	13	100
29	India	45	44	97.778
29	Indonesia	1	0	0
29	Singapore	27	2	7.407
29	South Korea	34	12	35.294
30	Bangladesh	41	36	87.805
30	China	13	11	84.615
30	India	1	1	100
30	Indonesia	6	0	0
30	Israel	27	8	29.63
30	Singapore	14	2	14.286
30	South Korea	48	16	33.333
30	Sri Lanka	3	0	0
31	Bangladesh	3	3	100
31	India	4	0	0
31	Indonesia	2	1	50
31	Singapore	8	0	0
31	South Korea	18	2	11.111
32	China	1	1	100
32	Indonesia	2	0	0
32	SaudiArabia	8	0	0
32	Singapore	1	1	100
33	China	8	7	87.5
33	India	128	125	97.656
33	Indonesia	3	1	33.333
33	Singapore	16	1	6.25
33	South Korea	1	0	0
33	Taiwan	1	1	100
34	China	1	0	0
34	India	29	24	82.759
34	Indonesia	2	2	100
34	Singapore	12	3	25
35	India	1	0	0
35	Singapore	9	4	44.444
36	Singapore	15	7	46.667
37	Singapore	5	3	60
62	China	2	0	0

## Sheet: Epiweek Europe
Epiweek	Country	Number of sequences*	K203+R204 sequences	K203+R204 frequency	* Num. of sequences with valid aa in positions 203 and 204
4	France	3	0	0
5	England	2	0	0
5	Finland	1	0	0
5	France	5	0	0
5	Germany	15	3	20
5	Italy	4	0	0
5	Lithuania	1	0	0
5	Sweden	1	0	0
6	Belgium	1	0	0
6	England	9	0	0
6	France	2	0	0
6	Germany	3	0	0
6	Italy	3	0	0
6	Sweden	1	0	0
7	England	9	0	0
7	Italy	1	0	0
8	England	7	1	14.286
8	France	2	0	0
8	Italy	7	0	0
9	Austria	7	6	85.714
9	Belgium	1	0	0
9	Czech Republic	1	0	0
9	Denmark	2	1	50
9	England	91	13	14.286
9	Finland	1	0	0
9	France	9	0	0
9	Germany	11	1	9.091
9	Greece	1	0	0
9	Italy	25	4	16
9	Luxembourg	2	0	0
9	Netherlands	14	8	57.143
9	Northern Ireland	1	0	0
9	Norway	7	0	0
9	Scotland	1	1	100
9	Spain	21	2	9.524
9	Sweden	5	0	0
9	Switzerland	27	22	81.481
9	Wales	1	0	0
10	Austria	36	23	63.889
10	Belgium	98	53	54.082
10	Croatia	2	1	50
10	Czech Republic	2	1	50
10	Denmark	19	6	31.579
10	England	611	176	28.805
10	Faroe Islands	2	0	0
10	Finland	10	4	40
10	France	52	1	1.923
10	Germany	31	6	19.355
10	Greece	4	1	25
10	Iceland	44	20	45.455
10	Ireland	7	3	42.857
10	Italy	28	4	14.286
10	Luxembourg	3	0	0
10	Netherlands	103	45	43.689
10	Norway	5	0	0
10	Poland	3	0	0
10	Portugal	14	5	35.714
10	Scotland	23	4	17.391
10	Slovakia	3	0	0
10	Slovenia	2	0	0
10	Spain	219	2	0.913
10	Sweden	122	76	62.295
10	Switzerland	78	24	30.769
10	Wales	6	4	66.667
11	Andorra	1	0	0
11	Austria	83	22	26.506
11	Belgium	41	9	21.951
11	Bulgaria	1	0	0
11	Croatia	2	1	50
11	Cyprus	1	1	100
11	Czech Republic	6	4	66.667
11	Denmark	243	16	6.584
11	England	974	261	26.797
11	Faroe Islands	5	0	0
11	Finland	28	2	7.143
11	France	49	0	0
11	Germany	45	12	26.667
11	Greece	51	33	64.706
11	Iceland	103	30	29.126
11	Ireland	6	3	50
11	Italy	17	6	35.294
11	Luxembourg	27	1	3.704
11	Moldova	5	0	0
11	Netherlands	182	32	17.582
11	Northern Ireland	11	2	18.182
11	Norway	13	2	15.385
11	Poland	2	0	0
11	Portugal	66	33	50
11	Russia	12	8	66.667
11	Scotland	110	26	23.636
11	Slovakia	1	0	0
11	Spain	561	16	2.852
11	Sweden	130	35	26.923
11	Switzerland	223	26	11.659
11	Wales	59	15	25.424
12	Austria	89	39	43.82
12	Belgium	79	17	21.519
12	Bosnia and Herzegovina	10	0	0
12	Bulgaria	1	1	100
12	Croatia	3	1	33.333
12	Czech Republic	23	16	69.565
12	Denmark	57	1	1.754
12	England	1637	407	24.863
12	Faroe Islands	7	0	0
12	Finland	2	0	0
12	France	97	7	7.216
12	Germany	61	16	26.23
12	Greece	26	15	57.692
12	Hungary	12	3	25
12	Iceland	300	58	19.333
12	Italy	43	27	62.791
12	Latvia	7	4	57.143
12	Luxembourg	66	1	1.515
12	Montenegro	3	1	33.333
12	Netherlands	155	31	20
12	Northern Ireland	39	12	30.769
12	Norway	7	2	28.571
12	Poland	7	1	14.286
12	Portugal	369	190	51.491
12	Romania	1	1	100
12	Russia	25	9	36
12	Scotland	201	27	13.433
12	Spain	784	61	7.781
12	Sweden	31	10	32.258
12	Switzerland	252	33	13.095
12	Turkey	33	2	6.061
12	UK	2	1	50
12	Wales	187	26	13.904
13	Austria	93	25	26.882
13	Belgium	224	55	24.554
13	Bosnia and Herzegovina	9	1	11.111
13	Cyprus	3	3	100
13	Czech Republic	16	9	56.25
13	Denmark	218	10	4.587
13	England	3308	1311	39.631
13	Finland	2	0	0
13	France	120	8	6.667
13	Germany	30	14	46.667
13	Greece	16	11	68.75
13	Hungary	21	8	38.095
13	Iceland	62	14	22.581
13	Italy	36	18	50
13	Latvia	18	7	38.889
13	Luxembourg	53	6	11.321
13	Netherlands	227	30	13.216
13	Northern Ireland	122	51	41.803
13	Norway	6	1	16.667
13	Poland	13	2	15.385
13	Portugal	583	247	42.367
13	Romania	11	1	9.091
13	Russia	38	19	50
13	Scotland	687	118	17.176
13	Slovenia	1	0	0
13	Spain	773	110	14.23
13	Sweden	42	7	16.667
13	Switzerland	113	16	14.159
13	Turkey	29	8	27.586
13	Ukraine	1	0	0
13	Wales	472	129	27.331
14	Austria	65	19	29.231
14	Belgium	176	50	28.409
14	Bosnia and Herzegovina	5	0	0
14	Bulgaria	2	0	0
14	Croatia	4	0	0
14	Cyprus	1	1	100
14	Czech Republic	8	3	37.5
14	Denmark	95	5	5.263
14	England	3950	1871	47.367
14	Finland	35	3	8.571
14	France	63	8	12.698
14	Germany	42	17	40.476
14	Greece	12	6	50
14	Hungary	14	4	28.571
14	Iceland	4	1	25
14	Ireland	5	4	80
14	Italy	18	9	50
14	Latvia	5	2	40
14	Luxembourg	38	4	10.526
14	Netherlands	220	35	15.909
14	Northern Ireland	57	35	61.404
14	Norway	6	0	0
14	Poland	27	13	48.148
14	Portugal	206	92	44.66
14	Russia	53	40	75.472
14	Scotland	715	117	16.364
14	Serbia	5	5	100
14	Slovenia	1	0	0
14	Spain	455	57	12.527
14	Sweden	42	10	23.81
14	Switzerland	110	23	20.909
14	Turkey	1	0	0
14	Wales	901	318	35.294
15	Austria	24	9	37.5
15	Belgium	164	56	34.146
15	Bosnia and Herzegovina	2	0	0
15	Croatia	3	0	0
15	Cyprus	1	1	100
15	Czech Republic	3	2	66.667
15	Denmark	2	1	50
15	England	3196	1803	56.414
15	Finland	52	1	1.923
15	France	46	5	10.87
15	Germany	23	2	8.696
15	Greece	3	2	66.667
15	Hungary	9	9	100
15	Italy	37	28	75.676
15	Luxembourg	20	2	10
15	Netherlands	139	36	25.899
15	Northern Ireland	74	51	68.919
15	Norway	4	0	0
15	Poland	7	5	71.429
15	Portugal	67	25	37.313
15	Romania	11	2	18.182
15	Russia	47	37	78.723
15	Scotland	747	120	16.064
15	Serbia	1	0	0
15	Spain	325	71	21.846
15	Sweden	27	4	14.815
15	Switzerland	62	23	37.097
15	Turkey	4	0	0
15	Wales	878	379	43.166
16	Austria	6	0	0
16	Belgium	38	9	23.684
16	Bulgaria	1	0	0
16	Cyprus	1	0	0
16	Czech Republic	1	1	100
16	Denmark	27	4	14.815
16	England	2702	1713	63.397
16	Finland	52	1	1.923
16	France	5	0	0
16	Germany	20	4	20
16	Greece	2	1	50
16	Hungary	9	7	77.778
16	Italy	8	2	25
16	Latvia	2	0	0
16	Lithuania	1	0	0
16	Luxembourg	23	1	4.348
16	Netherlands	100	11	11
16	Northern Ireland	157	129	82.166
16	Norway	4	0	0
16	Poland	4	3	75
16	Portugal	45	29	64.444
16	Romania	15	8	53.333
16	Russia	31	22	70.968
16	Scotland	760	106	13.947
16	Serbia	1	1	100
16	Spain	216	42	19.444
16	Sweden	19	7	36.842
16	Switzerland	34	5	14.706
16	Turkey	14	9	64.286
16	Wales	562	263	46.797
17	Austria	6	0	0
17	Belgium	17	2	11.765
17	Bosnia and Herzegovina	2	0	0
17	Bulgaria	3	2	66.667
17	Croatia	1	1	100
17	Czech Republic	1	0	0
17	Denmark	6	1	16.667
17	England	2143	1362	63.556
17	Finland	23	0	0
17	Germany	21	7	33.333
17	Greece	4	3	75
17	Hungary	10	9	90
17	Italy	1	0	0
17	Latvia	1	0	0
17	Luxembourg	18	0	0
17	Netherlands	112	38	33.929
17	Northern Ireland	119	92	77.311
17	Norway	5	1	20
17	Poland	2	2	100
17	Portugal	39	17	43.59
17	Romania	11	0	0
17	Russia	58	40	68.966
17	Scotland	681	139	20.411
17	Serbia	4	2	50
17	Slovenia	1	0	0
17	Spain	215	29	13.488
17	Sweden	34	13	38.235
17	Switzerland	31	6	19.355
17	Turkey	12	7	58.333
17	Ukraine	2	2	100
17	Wales	409	204	49.878
18	Belgium	11	4	36.364
18	Bosnia and Herzegovina	1	1	100
18	Bulgaria	3	3	100
18	Cyprus	1	1	100
18	Denmark	25	0	0
18	England	1695	1151	67.906
18	Finland	19	0	0
18	France	1	0	0
18	Germany	17	5	29.412
18	Greece	1	1	100
18	Hungary	3	2	66.667
18	Italy	12	7	58.333
18	Latvia	11	7	63.636
18	Luxembourg	6	2	33.333
18	Netherlands	84	13	15.476
18	Northern Ireland	97	76	78.351
18	Norway	2	0	0
18	Poland	6	6	100
18	Portugal	21	11	52.381
18	Romania	16	3	18.75
18	Russia	44	35	79.545
18	Scotland	379	76	20.053
18	Serbia	2	1	50
18	Spain	58	11	18.966
18	Sweden	16	7	43.75
18	Switzerland	59	20	33.898
18	Turkey	22	8	36.364
18	Wales	364	197	54.121
19	Austria	2	0	0
19	Belgium	27	15	55.556
19	Bulgaria	1	1	100
19	Denmark	1	1	100
19	England	1125	786	69.867
19	Finland	36	1	2.778
19	Germany	3	2	66.667
19	Greece	2	2	100
19	Hungary	1	0	0
19	Italy	3	2	66.667
19	Latvia	7	5	71.429
19	Luxembourg	1	0	0
19	Netherlands	71	10	14.085
19	Northern Ireland	65	55	84.615
19	Norway	2	0	0
19	Poland	15	14	93.333
19	Portugal	6	4	66.667
19	Romania	1	1	100
19	Russia	14	12	85.714
19	Scotland	266	51	19.173
19	Spain	56	10	17.857
19	Sweden	17	7	41.176
19	Switzerland	21	11	52.381
19	Turkey	40	25	62.5
19	Ukraine	2	1	50
19	Wales	277	160	57.762
20	Belgium	34	10	29.412
20	Bulgaria	2	1	50
20	England	899	661	73.526
20	Finland	5	0	0
20	Germany	7	2	28.571
20	Greece	2	2	100
20	Hungary	3	1	33.333
20	Italy	13	1	7.692
20	Latvia	1	1	100
20	Luxembourg	7	0	0
20	Netherlands	40	8	20
20	Northern Ireland	37	35	94.595
20	Norway	1	1	100
20	Poland	1	1	100
20	Romania	12	6	50
20	Russia	26	23	88.462
20	Scotland	305	54	17.705
20	Serbia	2	0	0
20	Spain	42	2	4.762
20	Sweden	21	12	57.143
20	Switzerland	9	5	55.556
20	Turkey	5	3	60
20	Ukraine	8	2	25
20	Wales	232	128	55.172
21	Belgium	14	0	0
21	Bulgaria	1	1	100
21	England	619	477	77.06
21	Germany	29	4	13.793
21	Ireland	3	3	100
21	Luxembourg	5	0	0
21	Netherlands	160	24	15
21	Northern Ireland	54	52	96.296
21	Poland	1	1	100
21	Portugal	17	15	88.235
21	Romania	3	0	0
21	Russia	6	6	100
21	Scotland	195	34	17.436
21	Spain	29	4	13.793
21	Sweden	24	8	33.333
21	Switzerland	6	4	66.667
21	Turkey	15	13	86.667
21	Wales	284	170	59.859
22	Belgium	2	0	0
22	Bosnia and Herzegovina	2	1	50
22	Czech Republic	1	1	100
22	England	368	283	76.902
22	Germany	25	0	0
22	Hungary	1	0	0
22	Ireland	5	5	100
22	Italy	1	1	100
22	Latvia	1	1	100
22	Netherlands	59	22	37.288
22	Northern Ireland	12	10	83.333
22	Norway	1	0	0
22	Portugal	29	27	93.103
22	Romania	5	0	0
22	Russia	18	14	77.778
22	Scotland	70	15	21.429
22	Spain	21	4	19.048
22	Sweden	29	14	48.276
22	Switzerland	7	2	28.571
22	Turkey	8	7	87.5
22	Ukraine	19	4	21.053
22	Wales	212	140	66.038
23	Belgium	3	0	0
23	England	359	255	71.031
23	Germany	3	0	0
23	Hungary	1	0	0
23	Ireland	1	1	100
23	Latvia	2	1	50
23	Netherlands	37	8	21.622
23	North Macedonia	3	2	66.667
23	Northern Ireland	1	1	100
23	Poland	19	14	73.684
23	Portugal	29	26	89.655
23	Romania	7	3	42.857
23	Russia	16	16	100
23	Scotland	60	6	10
23	Spain	14	3	21.429
23	Sweden	21	14	66.667
23	Switzerland	8	6	75
23	Turkey	4	3	75
23	Wales	95	66	69.474
24	Belgium	2	1	50
24	England	246	206	83.74
24	France	9	0	0
24	Germany	2	0	0
24	Ireland	1	1	100
24	Italy	4	2	50
24	Netherlands	36	18	50
24	North Macedonia	9	8	88.889
24	Poland	5	5	100
24	Portugal	26	26	100
24	Romania	15	4	26.667
24	Russia	13	13	100
24	Scotland	20	8	40
24	Spain	20	5	25
24	Sweden	7	6	85.714
24	Switzerland	8	6	75
24	Wales	95	77	81.053
25	Belgium	4	3	75
25	England	294	223	75.85
25	France	2	0	0
25	Germany	8	0	0
25	Italy	1	1	100
25	Latvia	5	5	100
25	Moldova	3	3	100
25	Netherlands	26	8	30.769
25	North Macedonia	2	2	100
25	Northern Ireland	4	4	100
25	Portugal	6	6	100
25	Romania	2	0	0
25	Russia	1	1	100
25	Scotland	21	13	61.905
25	Spain	18	5	27.778
25	Sweden	7	1	14.286
25	Switzerland	12	12	100
25	Turkey	1	0	0
25	Wales	104	88	84.615
26	Belgium	5	2	40
26	England	102	88	86.275
26	Latvia	1	1	100
26	Netherlands	33	18	54.545
26	North Macedonia	14	11	78.571
26	Northern Ireland	3	3	100
26	Norway	20	3	15
26	Portugal	1	1	100
26	Scotland	20	13	65
26	Spain	68	12	17.647
26	Sweden	4	3	75
26	Switzerland	20	18	90
26	Turkey	2	2	100
26	Ukraine	14	2	14.286
26	Wales	128	125	97.656
27	Belgium	4	4	100
27	England	88	78	88.636
27	Ireland	8	3	37.5
27	Italy	4	3	75
27	Latvia	2	1	50
27	Netherlands	32	16	50
27	Norway	33	10	30.303
27	Scotland	10	9	90
27	Spain	19	1	5.263
27	Sweden	3	3	100
27	Switzerland	40	36	90
27	Wales	10	10	100
28	Belgium	9	8	88.889
28	England	90	80	88.889
28	Ireland	26	8	30.769
28	Italy	6	6	100
28	Latvia	22	13	59.091
28	Netherlands	21	12	57.143
28	North Macedonia	1	0	0
28	Northern Ireland	3	3	100
28	Norway	14	5	35.714
28	Serbia	1	1	100
28	Spain	10	2	20
28	Sweden	4	3	75
28	Switzerland	72	61	84.722
28	Ukraine	3	2	66.667
28	Wales	10	10	100
29	Belgium	14	11	78.571
29	England	298	263	88.255
29	Ireland	1	0	0
29	Latvia	7	5	71.429
29	Montenegro	6	6	100
29	Netherlands	3	1	33.333
29	North Macedonia	2	1	50
29	Northern Ireland	32	30	93.75
29	Norway	3	1	33.333
29	Russia	9	9	100
29	Scotland	13	11	84.615
29	Serbia	3	3	100
29	Spain	5	0	0
29	Sweden	8	5	62.5
29	Switzerland	50	43	86
29	Wales	22	17	77.273
30	Belgium	6	6	100
30	England	261	232	88.889
30	Ireland	21	7	33.333
30	Italy	3	2	66.667
30	Latvia	6	2	33.333
30	Montenegro	3	3	100
30	Netherlands	15	9	60
30	North Macedonia	1	1	100
30	Northern Ireland	20	15	75
30	Scotland	30	28	93.333
30	Spain	1	1	100
30	Sweden	2	1	50
30	Switzerland	63	54	85.714
30	Wales	47	46	97.872
31	England	234	208	88.889
31	Ireland	38	6	15.789
31	Latvia	5	0	0
31	Netherlands	19	7	36.842
31	Northern Ireland	24	21	87.5
31	Scotland	27	24	88.889
31	Spain	2	2	100
31	Sweden	7	5	71.429
31	Switzerland	51	44	86.275
31	Wales	31	31	100
32	England	531	408	76.836
32	Ireland	28	0	0
32	Latvia	17	1	5.882
32	Netherlands	37	11	29.73
32	Northern Ireland	57	54	94.737
32	Scotland	180	167	92.778
32	Spain	1	0	0
32	Sweden	5	5	100
32	Switzerland	60	32	53.333
32	Wales	11	10	90.909
33	England	821	583	71.011
33	Ireland	46	4	8.696
33	Latvia	1	1	100
33	Netherlands	57	19	33.333
33	Northern Ireland	177	151	85.311
33	Scotland	235	168	71.489
33	Sweden	6	2	33.333
33	Switzerland	69	31	44.928
33	Wales	22	12	54.545
34	England	390	240	61.538
34	Germany	20	7	35
34	Latvia	2	1	50
34	Netherlands	7	2	28.571
34	Northern Ireland	202	160	79.208
34	Scotland	293	64	21.843
34	Sweden	2	2	100
34	Switzerland	75	32	42.667
34	Wales	16	5	31.25
35	England	335	155	46.269
35	Germany	19	16	84.211
35	Latvia	11	2	18.182
35	Northern Ireland	7	5	71.429
35	Scotland	99	13	13.131
35	Switzerland	101	19	18.812
35	Wales	20	5	25
36	England	108	62	57.407
36	Scotland	62	18	29.032
36	Spain	2	0	0
36	Wales	50	21	42
37	England	2	0	0
37	Wales	29	1	3.448
