# Supplementary material for: Evolution of SARS-CoV-2 Envelope, Membrane, Nucleocapsid, and Spike Structural Proteins from the Beginning of the Pandemic to September 2020: A Global and Regional Approach by Epidemiological Week
Source: Viruses. 2021 Feb 4;13(2):243. doi: 10.3390/v13020243 (PMC7913946; doi:10.3390/v13020243)
Supplement: Supplementary file 1 [file viruses-13-00243-s001.zip › Supplementary_Table_5.xlsx]

## Sheet: 203+204
REGION	NUMBER OF SEQ.	EPIWEEK	AA	NUM AA SEQ.	%
1	3	4	1	3	100
1	29	5	1	26	89.6552
1	29	5	2	3	10.3448
1	19	6	1	19	100
1	10	7	1	10	100
1	16	8	1	15	93.75
1	16	8	2	1	6.25
1	228	9	1	170	74.5614
1	228	9	2	58	25.4386
1	1527	10	1	1068	69.9411
1	1527	10	2	459	30.0589
1	3058	11	1	2459	80.412
1	3058	11	2	596	19.4899
1	3058	11	5	3	0.0981033
1	4616	12	4	6	0.129983
1	4616	12	3	2	0.0433276
1	4616	12	2	1020	22.0971
1	4616	12	5	4	0.0866551
1	4616	12	1	3584	77.643
1	7347	13	4	12	0.163332
1	7347	13	2	2239	30.475
1	7347	13	5	3	0.040833
1	7347	13	1	5089	69.2664
1	7347	13	7	2	0.027222
1	7347	13	6	2	0.027222
1	7341	14	8	1	0.0136221
1	7341	14	4	6	0.0817327
1	7341	14	3	1	0.0136221
1	7341	14	2	2752	37.4881
1	7341	14	5	4	0.0544885
1	7341	14	1	4574	62.3076
1	7341	14	6	3	0.0408664
1	5978	15	4	7	0.117096
1	5978	15	3	1	0.016728
1	5978	15	2	2674	44.7307
1	5978	15	5	3	0.050184
1	5978	15	1	3286	54.9682
1	5978	15	7	3	0.050184
1	5978	15	8	1	0.016728
1	5978	15	6	3	0.050184
1	4860	16	4	2	0.0411523
1	4860	16	3	1	0.0205761
1	4860	16	2	2378	48.93
1	4860	16	5	1	0.0205761
1	4860	16	1	2476	50.9465
1	4860	16	7	1	0.0205761
1	4860	16	6	1	0.0205761
1	3992	17	3	2	0.0501002
1	3992	17	2	1979	49.5741
1	3992	17	1	2009	50.3257
1	3992	17	7	1	0.0250501
1	3992	17	6	1	0.0250501
1	2976	18	3	2	0.0672043
1	2976	18	2	1648	55.3763
1	2976	18	1	1324	44.4892
1	2976	18	6	2	0.0672043
1	2062	19	4	1	0.0484966
1	2062	19	3	1	0.0484966
1	2062	19	2	1176	57.032
1	2062	19	1	884	42.871
1	1714	20	3	1	0.0583431
1	1714	20	2	959	55.951
1	1714	20	5	1	0.0583431
1	1714	20	1	751	43.8156
1	1714	20	6	2	0.116686
1	1465	21	4	1	0.0682594
1	1465	21	3	2	0.136519
1	1465	21	2	816	55.6997
1	1465	21	1	646	44.0956
1	896	22	3	1	0.111607
1	896	22	2	551	61.4955
1	896	22	1	344	38.3929
1	683	23	2	425	62.2255
1	683	23	1	257	37.6281
1	683	23	6	1	0.146413
1	518	24	2	386	74.5174
1	518	24	1	132	25.4826
1	521	25	2	375	71.977
1	521	25	1	146	28.023
1	435	26	3	1	0.229885
1	435	26	2	302	69.4253
1	435	26	1	132	30.3448
1	253	27	4	1	0.395257
1	253	27	2	174	68.7747
1	253	27	1	78	30.83
1	292	28	4	8	2.73973
1	292	28	2	214	73.2877
1	292	28	5	2	0.684932
1	292	28	1	68	23.2877
1	476	29	4	1	0.210084
1	476	29	3	1	0.210084
1	476	29	2	406	85.2941
1	476	29	5	1	0.210084
1	476	29	1	67	14.0756
1	479	30	4	2	0.417537
1	479	30	3	1	0.208768
1	479	30	2	407	84.9687
1	479	30	5	1	0.208768
1	479	30	1	68	14.1962
1	438	31	4	5	1.14155
1	438	31	2	348	79.4521
1	438	31	1	85	19.4064
1	927	32	4	18	1.94175
1	927	32	3	2	0.21575
1	927	32	8	1	0.107875
1	927	32	2	688	74.2179
1	927	32	1	218	23.5167
1	1434	33	4	1	0.069735
1	1434	33	3	7	0.488145
1	1434	33	2	971	67.7127
1	1434	33	1	455	31.7294
1	1007	34	4	2	0.19861
1	1007	34	3	143	14.2006
1	1007	34	2	513	50.9434
1	1007	34	1	349	34.6574
1	592	35	4	1	0.168919
1	592	35	3	1	0.168919
1	592	35	2	215	36.3176
1	592	35	1	375	63.3446
1	222	36	2	101	45.4955
1	222	36	1	121	54.5045
1	31	37	2	1	3.22581
1	31	37	1	30	96.7742
2	1	8	1	1	100
2	3	9	2	1	33.3333
2	3	9	1	2	66.6667
2	9	10	2	1	11.1111
2	9	10	1	8	88.8889
2	12	11	1	12	100
2	64	12	2	9	14.0625
2	64	12	1	55	85.9375
2	71	13	2	10	14.0845
2	71	13	1	61	85.9155
2	102	14	2	17	16.6667
2	102	14	1	85	83.3333
2	78	15	2	18	23.0769
2	78	15	1	60	76.9231
2	65	16	2	4	6.15385
2	65	16	1	61	93.8462
2	90	17	2	14	15.5556
2	90	17	1	76	84.4444
2	105	18	2	13	12.381
2	105	18	1	92	87.619
2	41	19	2	20	48.7805
2	41	19	1	21	51.2195
2	53	20	2	17	32.0755
2	53	20	1	36	67.9245
2	47	21	2	20	42.5532
2	47	21	1	27	57.4468
2	82	22	2	19	23.1707
2	82	22	5	2	2.43902
2	82	22	1	61	74.3902
2	74	23	2	18	24.3243
2	74	23	1	56	75.6757
2	86	24	2	41	47.6744
2	86	24	1	45	52.3256
2	150	25	2	118	78.6667
2	150	25	1	32	21.3333
2	51	26	2	33	64.7059
2	51	26	1	18	35.2941
2	130	27	2	106	81.5385
2	130	27	1	24	18.4615
2	104	28	2	91	87.5
2	104	28	1	13	12.5
2	242	29	3	1	0.413223
2	242	29	2	200	82.6446
2	242	29	1	41	16.9421
2	192	30	2	166	86.4583
2	192	30	1	26	13.5417
2	161	31	2	151	93.7888
2	161	31	1	10	6.21118
2	55	32	2	52	94.5455
2	55	32	1	3	5.45455
2	43	33	2	29	67.4419
2	43	33	1	14	32.5581
2	51	34	2	26	50.9804
2	51	34	1	25	49.0196
2	23	35	2	23	100
3	26	1	1	26	100
3	11	2	1	11	100
3	27	3	1	27	100
3	178	4	1	178	100
3	276	5	1	276	100
3	185	6	1	185	100
3	130	7	1	130	100
3	171	8	1	171	100
3	153	9	1	153	100
3	185	10	2	15	8.10811
3	185	10	1	170	91.8919
3	300	11	4	1	0.333333
3	300	11	2	30	10
3	300	11	1	269	89.6667
3	613	12	2	151	24.633
3	613	12	1	462	75.367
3	411	13	4	1	0.243309
3	411	13	2	88	21.4112
3	411	13	1	322	78.3455
3	570	14	2	175	30.7018
3	570	14	1	395	69.2982
3	412	15	2	104	25.2427
3	412	15	1	308	74.7573
3	315	16	2	40	12.6984
3	315	16	1	275	87.3016
3	314	17	2	68	21.6561
3	314	17	1	246	78.3439
3	322	18	2	74	22.9814
3	322	18	1	248	77.0186
3	275	19	2	43	15.6364
3	275	19	1	232	84.3636
3	295	20	2	112	37.9661
3	295	20	1	183	62.0339
3	403	21	2	132	32.7543
3	403	21	1	271	67.2457
3	462	22	2	154	33.3333
3	462	22	1	308	66.6667
3	357	23	2	140	39.2157
3	357	23	1	217	60.7843
3	399	24	8	1	0.250627
3	399	24	2	130	32.5815
3	399	24	1	268	67.1679
3	486	25	4	2	0.411523
3	486	25	2	262	53.9095
3	486	25	8	1	0.205761
3	486	25	1	221	45.4733
3	167	26	4	2	1.1976
3	167	26	2	47	28.1437
3	167	26	1	118	70.6587
3	98	27	2	18	18.3673
3	98	27	1	80	81.6327
3	181	28	4	5	2.76243
3	181	28	2	83	45.8564
3	181	28	1	93	51.3812
3	150	29	2	97	64.6667
3	150	29	1	53	35.3333
3	153	30	2	74	48.366
3	153	30	8	1	0.653595
3	153	30	1	78	50.9804
3	35	31	2	6	17.1429
3	35	31	1	29	82.8571
3	12	32	2	2	16.6667
3	12	32	1	10	83.3333
3	157	33	2	135	85.9873
3	157	33	1	22	14.0127
3	44	34	2	29	65.9091
3	44	34	1	15	34.0909
3	10	35	2	4	40
3	10	35	1	6	60
3	15	36	2	7	46.6667
3	15	36	1	8	53.3333
3	5	37	2	3	60
3	5	37	1	2	40
3	2	62	1	2	100
4	9	4	1	9	100
4	14	5	1	14	100
4	1	6	1	1	100
4	2	7	1	2	100
4	27	8	1	27	100
4	90	9	2	6	6.66667
4	90	9	1	84	93.3333
4	385	10	2	8	2.07792
4	385	10	1	377	97.9221
4	1285	11	4	1	0.077821
4	1285	11	2	85	6.61479
4	1285	11	1	1199	93.3074
4	2315	12	4	1	0.0431965
4	2315	12	2	137	5.91793
4	2315	12	1	2176	93.9957
4	2315	12	6	1	0.0431965
4	2891	13	4	1	0.0345901
4	2891	13	2	178	6.15704
4	2891	13	1	2711	93.7738
4	2891	13	7	1	0.0345901
4	2996	14	4	1	0.0333778
4	2996	14	2	131	4.3725
4	2996	14	5	2	0.0667557
4	2996	14	1	2859	95.4272
4	2996	14	7	1	0.0333778
4	2996	14	6	2	0.0667557
4	1531	15	4	2	0.130634
4	1531	15	2	58	3.78837
4	1531	15	5	1	0.0653168
4	1531	15	1	1469	95.9504
4	1531	15	6	1	0.0653168
4	1165	16	2	58	4.97854
4	1165	16	1	1104	94.7639
4	1165	16	8	2	0.171674
4	1165	16	6	1	0.0858369
4	1160	17	2	92	7.93103
4	1160	17	1	1068	92.069
4	1304	18	2	122	9.35583
4	1304	18	1	1181	90.5675
4	1304	18	6	1	0.0766871
4	975	19	2	114	11.6923
4	975	19	5	1	0.102564
4	975	19	1	858	88
4	975	19	6	2	0.205128
4	1042	20	4	1	0.0959693
4	1042	20	2	109	10.4607
4	1042	20	1	930	89.2514
4	1042	20	6	2	0.191939
4	792	21	2	128	16.1616
4	792	21	1	663	83.7121
4	792	21	6	1	0.126263
4	794	22	2	219	27.5819
4	794	22	1	574	72.2922
4	794	22	7	1	0.125945
4	634	23	2	309	48.7382
4	634	23	1	325	51.2618
4	660	24	4	1	0.151515
4	660	24	2	301	45.6061
4	660	24	1	358	54.2424
4	644	25	2	258	40.0621
4	644	25	1	386	59.9379
4	454	26	8	2	0.440529
4	454	26	2	97	21.3656
4	454	26	5	3	0.660793
4	454	26	1	351	77.3128
4	454	26	6	1	0.220264
4	350	27	2	75	21.4286
4	350	27	5	2	0.571429
4	350	27	1	273	78
4	376	28	4	2	0.531915
4	376	28	2	65	17.2872
4	376	28	1	308	81.9149
4	376	28	7	1	0.265957
4	300	29	8	2	0.666667
4	300	29	2	45	15
4	300	29	5	1	0.333333
4	300	29	1	251	83.6667
4	300	29	6	1	0.333333
4	210	30	2	37	17.619
4	210	30	1	173	82.381
4	247	31	2	57	23.0769
4	247	31	1	190	76.9231
4	164	32	2	34	20.7317
4	164	32	1	130	79.2683
4	148	33	2	13	8.78378
4	148	33	1	135	91.2162
4	150	34	8	1	0.666667
4	150	34	2	31	20.6667
4	150	34	1	117	78
4	150	34	7	1	0.666667
4	38	35	2	8	21.0526
4	38	35	1	30	78.9474
4	55	36	2	21	38.1818
4	55	36	1	34	61.8182
4	51	37	2	7	13.7255
4	51	37	1	44	86.2745
5	5	9	1	5	100
5	26	10	2	14	53.8462
5	26	10	1	12	46.1538
5	76	11	2	21	27.6316
5	76	11	1	55	72.3684
5	167	12	2	58	34.7305
5	167	12	1	109	65.2695
5	126	13	2	69	54.7619
5	126	13	1	57	45.2381
5	258	14	2	157	60.8527
5	258	14	1	101	39.1473
5	119	15	2	96	80.6723
5	119	15	1	23	19.3277
5	128	16	2	121	94.5312
5	128	16	1	7	5.46875
5	86	17	2	79	91.8605
5	86	17	1	7	8.13953
5	77	18	2	62	80.5195
5	77	18	1	15	19.4805
5	48	19	2	38	79.1667
5	48	19	1	10	20.8333
5	6	20	2	3	50
5	6	20	1	3	50
5	5	21	2	2	40
5	5	21	1	3	60
5	9	22	2	9	100
5	6	23	2	4	66.6667
5	6	23	1	2	33.3333
5	1	24	1	1	100
5	19	25	2	8	42.1053
5	19	25	1	11	57.8947
5	28	26	2	1	3.57143
5	28	26	1	27	96.4286
5	41	27	2	29	70.7317
5	41	27	1	12	29.2683
5	3	28	2	1	33.3333
5	3	28	1	2	66.6667
5	21	29	2	3	14.2857
5	21	29	1	18	85.7143
5	12	30	1	12	100
5	1	31	1	1	100
5	9	32	2	4	44.4444
5	9	32	1	5	55.5556
5	15	33	2	5	33.3333
5	15	33	1	10	66.6667
5	9	34	2	2	22.2222
5	9	34	1	7	77.7778
6	8	4	1	8	100
6	10	5	1	10	100
6	4	6	1	4	100
6	2	8	1	2	100
6	8	9	1	8	100
6	24	10	2	3	12.5
6	24	10	1	21	87.5
6	105	11	2	10	9.52381
6	105	11	1	95	90.4762
6	480	12	4	3	0.625
6	480	12	2	68	14.1667
6	480	12	1	409	85.2083
6	678	13	2	96	14.1593
6	678	13	1	582	85.8407
6	418	14	2	43	10.2871
6	418	14	1	374	89.4737
6	418	14	6	1	0.239234
6	251	15	2	30	11.9522
6	251	15	1	221	88.0478
6	129	16	2	25	19.3798
6	129	16	1	104	80.6202
6	47	17	2	9	19.1489
6	47	17	1	38	80.8511
6	54	18	2	2	3.7037
6	54	18	1	52	96.2963
6	44	19	1	44	100
6	52	20	2	7	13.4615
6	52	20	1	45	86.5385
6	31	21	2	5	16.129
6	31	21	1	26	83.871
6	52	22	2	17	32.6923
6	52	22	1	35	67.3077
6	18	23	2	10	55.5556
6	18	23	1	8	44.4444
6	45	24	2	34	75.5556
6	45	24	1	11	24.4444
6	90	25	2	70	77.7778
6	90	25	5	1	1.11111
6	90	25	1	19	21.1111
6	211	26	2	200	94.7867
6	211	26	1	11	5.21327
6	431	27	2	421	97.6798
6	431	27	1	10	2.32019
6	851	28	2	845	99.2949
6	851	28	1	6	0.705053
6	1263	29	2	1263	100
6	879	30	2	878	99.8862
6	879	30	1	1	0.113766
6	45	31	2	45	100
6	5	32	2	3	60
6	5	32	1	2	40
6	2	33	1	2	100
6	8	34	2	8	100
6	9	35	2	9	100
6	7	36	2	7	100
6	3	37	2	3	100

## Sheet: Code
AA			Region
RG	1		EU	1
KR	2		AF	2
KL	3		AS	3
KG	4		NA	4
MG	5		SA	5
SG	6		OC	6
RR	7
Other	8
