# Supplementary figures and images for: Evolution of SARS-CoV-2 Envelope, Membrane, Nucleocapsid, and Spike Structural Proteins from the Beginning of the Pandemic to September 2020: A Global and Regional Approach by Epidemiological Week
Source: MDPI journal article supplement (doi:10.3390/v13020243), 2021-02-04

1    **Supplementary Figure 1.**

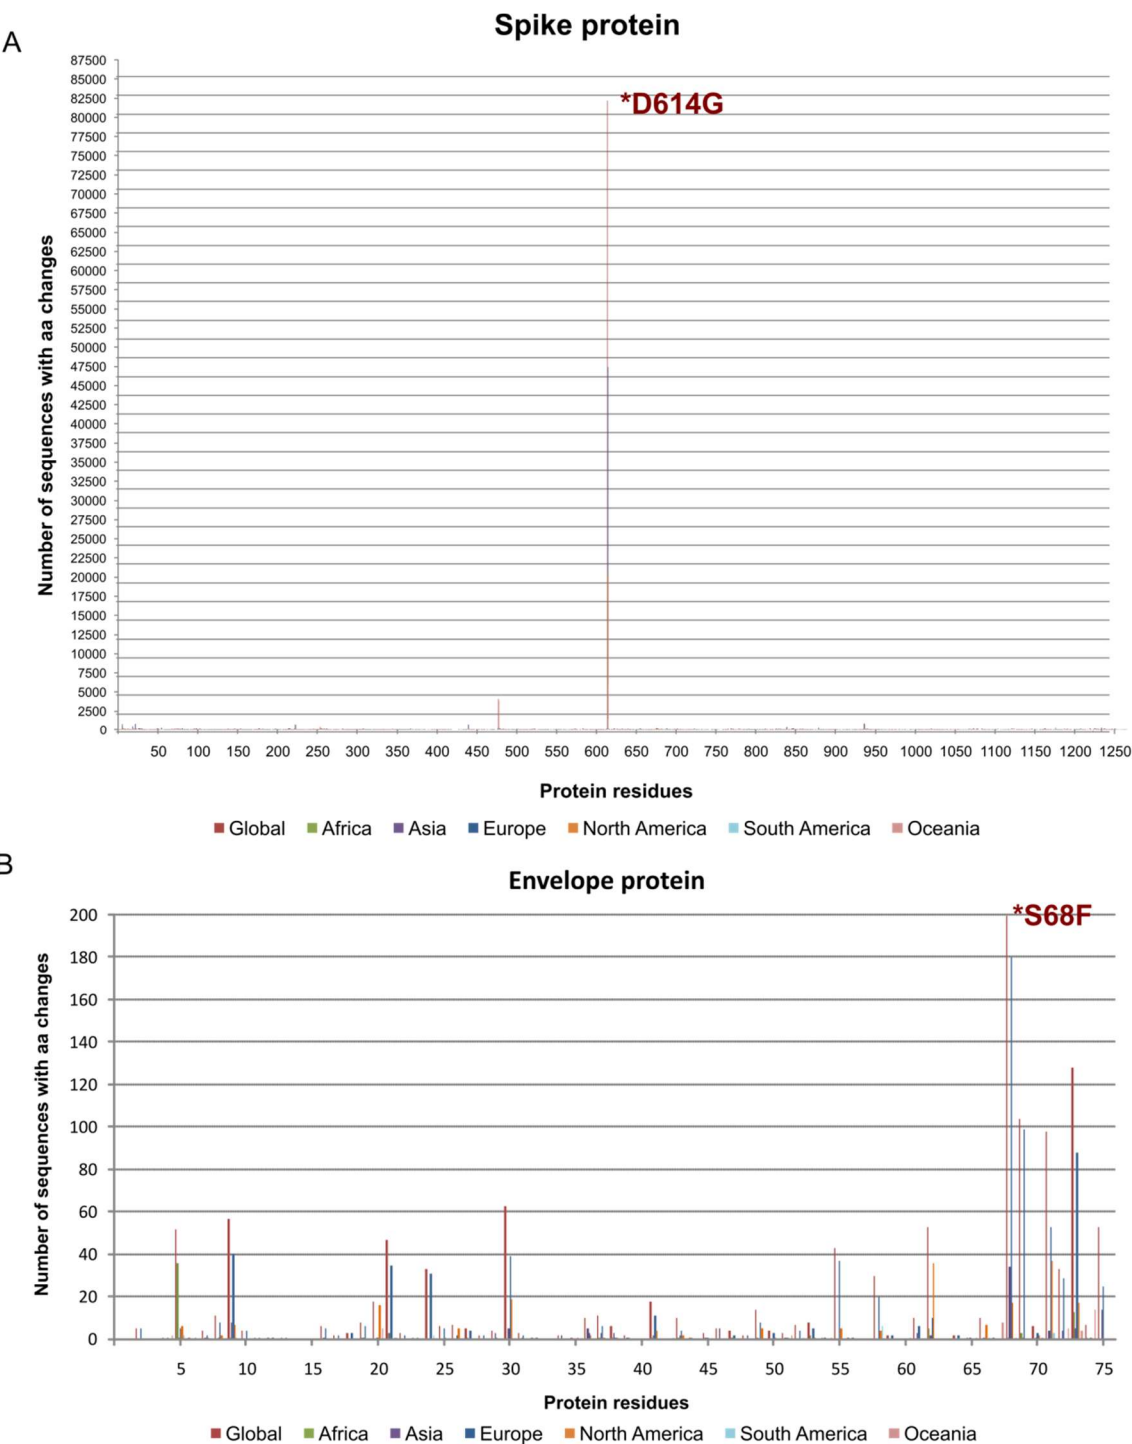

2

3

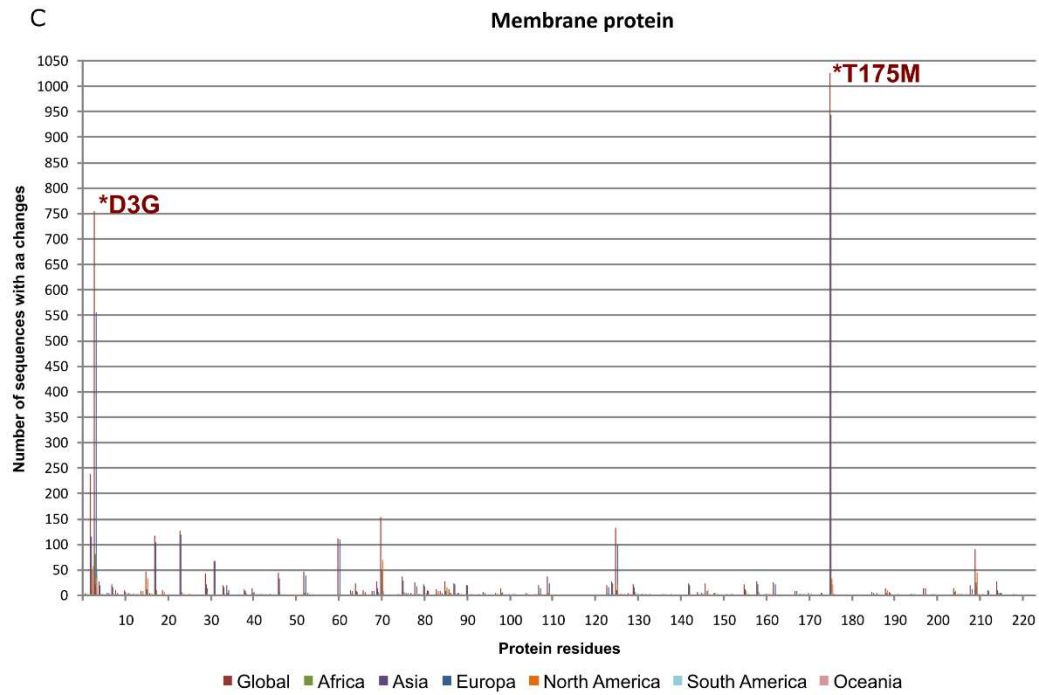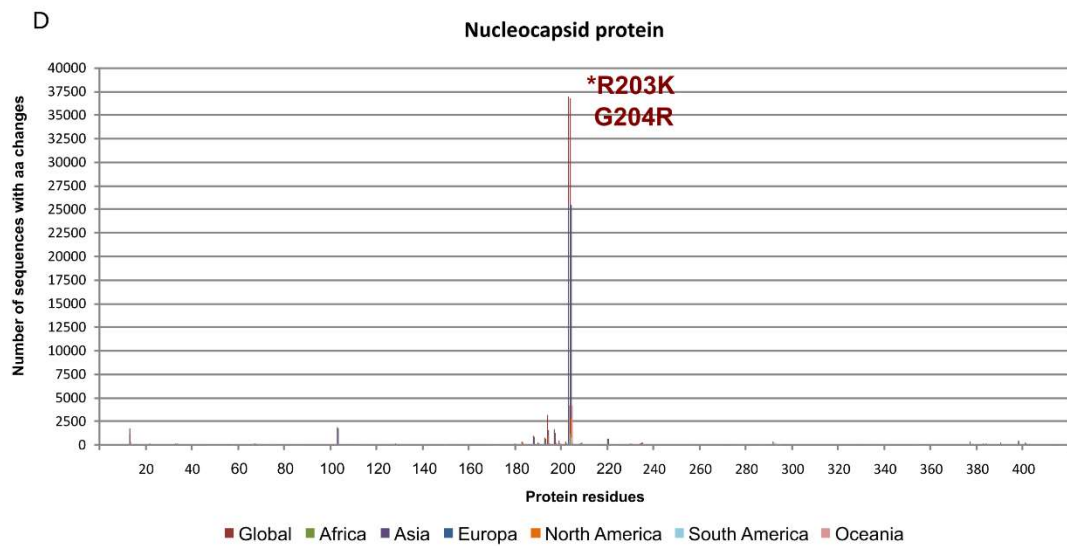

Supplement: s1 [file s1]
